# Increased pollination specialization did not increase corolla shape constraints in Antillean plants

Simon Joly<sup>1,2,\*</sup>, François Lambert<sup>2</sup>, Hermine Alexandre<sup>2</sup>, Julien Clavel<sup>3</sup>,  
Étienne Léveillé-Bourret<sup>2,\*\*</sup>, and John L. Clark<sup>4</sup>

<sup>1</sup>*Montreal Botanical Garden, Montréal, Canada*

<sup>2</sup>*Institut de recherche en biologie végétale, Département de sciences biologiques, Université de  
Montréal, Montréal, Canada*

<sup>3</sup>*Institut de biologie, École Normale Supérieure, Paris, France*

<sup>4</sup>*Department of Biological Sciences, The University of Alabama, Tuscaloosa, USA*

\**To whom correspondance should be addressed: Institut de recherche en biologie végétale, 4101  
Sherbrooke East, Montréal (QC) H1X 2B2, Canada; +1 514.872.0344; joly.simon@gmail.com.*

\*\**Present address: Department of Biology, University of Ottawa, Ottawa, Canada*

## Abstract

Flowers show important structural variation as reproductive organs but the evolutionary forces underlying this diversity are still poorly understood. In animal-pollinated species, flower shape is strongly fashioned by selection imposed by pollinators, which is expected to vary according to guilds of effective pollinators. Using the Antillean subtribe Gesneriinae (Gesneriaceae), we tested the hypothesis that pollination specialists pollinated by one functional type of pollinator have maintained more similar corolla shapes through time due to stronger selection constraints compared to species with more generalist pollination strategies. Using geometric morphometrics and evolutionary models, we showed that the corolla of hummingbird specialists, bat specialists, and species with a mixed-pollination strategy (pollinated by hummingbirds and bats; thus a more generalist strategy) have distinct shapes and that these shapes have evolved under evolutionary constraints. However, we did not find support for smaller disparity in corolla shape for hummingbird specialists compared to more generalist species. This could be because the corolla shape of more generalist species in subtribe Gesneriinae, which has evolved multiple times, is finely adapted to be effectively pollinated by both bats and hummingbirds. These results suggest that pollination generalization is not necessarily associated with relaxed selection constraints.

**Key-words:** Pollination syndromes, specialists-generalists, geometric morphometrics, phylogenetic comparative methods, Ornstein-Uhlenbeck (OU) models, stabilizing selection.

## Introduction

The variation of flower shapes and structures we observe in nature is a constant reminder  
3 of the power of natural selection. This diversity is often attributed to zoophilous pollina-  
tion, which has been associated with increased diversification in angiosperms (Stebbins, 1970;  
Crepet, 1984; Johnson, 2010; van der Niet and Johnson, 2012). Indeed, pollinator-driven se-  
6 lection pressure has been associated with species diversification (Whittall and Hodges, 2007)  
and frequent pollinator shifts often correlate with increased species diversification rates (e.g.,  
Valente et al., 2012; Forest et al., 2014; Breitkopf et al., 2015). Yet, despite the numerous  
9 studies on pollination-driven selection at the population level (reviewed below), on the dis-  
section of the genetic basis of several floral transitions between species pollinated by different  
pollinators (reviewed in: Galliot et al., 2006; Yuan et al., 2013) and of phylogenetic investi-  
12 gations of pollination systems at macroevolutionary levels (e.g., Perret et al., 2007; Smith,  
2010), there is still a gap in our understanding on how the microevolutionary forces operating  
at the population level shape the macroevolutionary patterns we observe (Waser, 1998).

15 Selection can affect flower morphology differently when a population is adapting to a novel  
pollinator guild (transition phase) compared to when it is under the influence of a relatively  
constant pollinator guild (stasis phase). The transition phase is expected to involve strong  
18 directional selection until the population has a phenotype close to the optimum for the new  
pollinators (Lande, 1976). Studies on pollinator-mediated selection have found evidence for  
strong directional selection for flower shape in the transition phase (Galen, 1989), while  
21 others have shown that pollinators can drive flower colour transitions in populations (Waser  
and Price, 1981; Stanton et al., 1986). Although not a direct measurement of selection,  
the numerous studies reporting geographically structured flower variation associated with  
24 variation in pollinator guilds further support these findings (e.g., Gómez and Perfectti, 2010;  
Newman et al., 2014; Niet et al., 2014; Martén-Rodríguez et al., 2011), especially when  
reciprocal transplant experiments confirmed these patterns (Newman et al., 2012; Boberg  
27 et al., 2014; Sun et al., 2014).

For populations in stasis phase, that is with a relatively constant selection pressure from a  
stable pollinator guild, the floral traits are expected to be under stabilizing selection around

30 optimal trait values. The mean phenotype of a population evolving under stabilizing selection  
is affected by both selection and drift, with selection pulling the mean phenotype towards  
the fitness optimum and drift due to finite population sizes moving it in random directions  
33 (Lande, 1976, 1979). Although stabilizing selection on floral traits have sometimes been ob-  
served in pollinator-mediated selection studies (Sahli and Conner, 2011; Conner et al., 2003),  
most studies failed to find such evidence (Campbell et al., 1991; O'Connell and Johnston,  
36 1998; Maad, 2000). This might be because these phases are not so stable and that these  
studies are typically performed on a yearly basis. Indeed, studies have shown that selection  
on floral traits can vary from year to year in populations (Campbell, 1989; Campbell et al.,  
39 1991) due to temporal variation in pollinator abundance or environmental conditions. Nev-  
ertheless, there is considerable evidence that traits involved in the mechanical fit between the  
flower and the pollinators are under long-term stabilizing selection pressure as they show less  
42 variation in populations than other traits (Muchhala, 2006; Cresswell, 1998). Interestingly,  
these observations suggest that evidence for such stabilizing selection might be better studied  
over many generations, or even at macroevolutionary scales, than for a single generation (see  
45 also Haller and Hendry, 2014).

The intensity of constraints during the stasis phase is also expected to vary according to  
the level of pollination generalization of the species of interest. If the flower shape of specialist  
48 flowers should show evidence of stabilizing selection around an optimal shape adapted to  
its pollinator, the expectations are less clear for flowers of generalist species that possess  
pollinators that are functionally different for the plant (Aigner, 2001, 2006; Sahli and Conner,  
51 2011). In general, unless the different functional pollinators all select for a common shape  
(common peak model: Sahli and Conner, 2011), generalists effectively pollinated by more  
than one functional type of pollinators are expected to be under weaker selection constraints  
54 than specialists (Johnson and Steiner, 2000). These predictions do not seem to have been  
tested thoroughly but are important to understand how and why flowers diversify under the  
selection of animal pollinators (Johnson, 2010).

57 In this study, we used a macroevolutionary approach to test whether increased specialisa-  
tion in pollination strategies is associated with reduced corolla shape diversification (dispar-  
ity) caused by stronger long-term selective constraints in species of the subtribe Gesneriinae

60 of the Gesneriaceae family in the Caribbean islands. The recent development of powerful  
phylogenetic comparative methods allows the estimation of historic selective constraints on  
large groups of species (e.g., Hansen and Martins, 1996; Beaulieu et al., 2012; Butler and  
63 King, 2004) and thus testing specific hypotheses regarding the role of pollinators on floral  
trait evolution (e.g., Gómez et al., 2015). Unlike many investigations performed at the pop-  
ulation level, such approaches aim at measuring selective constraints in terms of selective  
66 optima or in the rate at which disparity accrues over macroevolutionary scales and, as such,  
should be informative to understand the forces that have been determinant in modelling the  
morphology of large groups of species.

69 The subtribe Gesneriinae represents an ideal group to test this hypothesis. This diverse  
group in terms of floral morphologies is almost completely endemic to the Antilles and diver-  
sified into approximately 81 species (Skog, 2012) during the last 10 millions years (Roalson  
72 et al., 2008; Roalson and Roberts, 2016). The group has been the subject of several pollination  
studies that classified the species into different pollination syndromes that vary in their degree  
of ecological specialization (Martén-Rodríguez and Fenster, 2008; Martén-Rodríguez et al.,  
75 2009, 2010, 2015). There exists several definitions of pollination specialization/generalization,  
but globally plants pollinated by more species are considered more generalist (see papers in  
Waser and Ollerton, 2006), although information on the relative abundance (Medan et al.,  
78 2006) and functional diversity of pollinators (Johnson and Steiner, 2000; Fenster et al., 2004;  
Gómez and Zamora, 2006) should ideally taken into account. Here, we follow Fleming and  
Muchhala (2008) and measure ecological specialization with respect to the number of effec-  
81 tive functional pollinator groups, with species pollinated by more functional pollinator groups  
being more generalists.

Specialist pollination strategies in Gesneriinae include hummingbird pollination, bat pol-  
84 lination, moth pollination and bee pollination (Fig. 1). Species with these strategies are  
pollinated by a single functional type (or guild) of pollinator and most often by a single  
species (Martén-Rodríguez and Fenster, 2008; Martén-Rodríguez et al., 2009, 2010, 2015).  
87 A fifth pollination strategy is considered more generalist as it is effectively pollinated in  
similar proportion by hummingbirds and bats (Martén-Rodríguez et al., 2009), two polli-  
nators belonging to different functional groups that have different plant (growth form) and

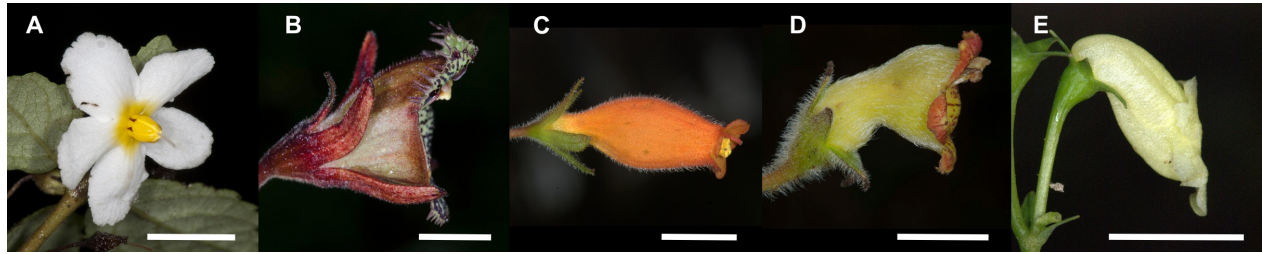

**Figure 1:** Gesneriinae flowers showing the different pollination strategies discussed in the study: (A) bee pollination (*Bellonia spinosa*, voucher: XXX); (B) bat pollination (*Gesneria fruticosa*, voucher: XXX); (C) hummingbird pollination (*Rhytidophyllum rupicola*, voucher: XXX); (D) mixed-pollination (*Rhytidophyllum auriculatum*, voucher: XXX); (E) moth pollination (*Gesneria humilis*, voucher: XXX). The bar indicates 1 cm. Photographs by XXX.

90 floral (nectar, shape, colour) preferences (Baker, 1961; Faegri and van der Pijl, 1979; Flem-  
ming et al., 2005). Although there exists many examples of more generalist species, these  
species are nevertheless ecologically more generalized than species pollinated by a single  
93 functional group of pollinators because they rely on more diversified resources (Gómez and  
Zamora, 2006). To avoid confusion with super-generalist species, we will use the term mixed-  
pollination strategy to refer to them in this study. Species of the Gesneriinae are sometimes  
96 visited by insects, but these always have marginal importance (Martén-Rodríguez and Fen-  
ster, 2008; Martén-Rodríguez et al., 2009, 2015) except for the insect pollination syndromes.  
A phylogenetic study of the group suggested multiple origins of most pollination strategies  
99 (Martén-Rodríguez et al., 2010), making it a perfect group to study selective forces acting  
on each one. In this study, we augmented previous phylogenetic hypotheses of the group by  
adding more species and genetic markers and we used geometric morphometrics of corolla  
102 shape and evolutionary models to test that (1) corolla shape evolution in the group supports  
distinct pollination syndromes, (2) corolla shape evolution is characterized by long-term  
constraints, and that (3) the corolla shape of pollination specialists show reduced disparity  
105 compared to the mixed-pollination species.

## Material and Methods

### Floral morphology and pollination strategies

108 We took and collected photographs of 137 flowers in anthesis (137 distinct individuals, all  
from different localities) in longitudinal view, from 50 species (supplementary Table S1, S2;  
picture thumbnails are available as supplementary material) for a mean of 2.8 individuals per  
111 species (sd. dev. = 2.4). Most of these were taken in the wild, but a few specimens came from  
botanical gardens. We also took three pictures of the same flower (releasing and grabbing  
the pedicel between pictures) for four species at the Montreal Botanical Garden to quantify  
114 the error involved in hand-photographing the specimens as this is how most specimens were  
photographed.

Pollinator information was obtained from the literature (Martén-Rodríguez and Fenster,  
117 2008; Martén-Rodríguez et al., 2009, 2010, 2015). Pollination strategy of species without  
field observation were inferred following the conclusions of Martén-Rodríguez et al. (2009).  
Briefly, hummingbird specialists have straight tubular corollas with bright colours and di-  
120 urnal anthesis, bat specialists have green or white campanulate (bell-shaped) corollas with  
nocturnal anthesis and exerted anthers, and species with a mixed-pollination strategy are  
intermediate with subcampanulate corollas (bell-shaped with a basal constriction) showing  
123 various colours with frequent coloured spots, and diurnal as well as nocturnal anther dehis-  
cence and nectar production (Martén-Rodríguez et al., 2009, Fig. 1). So far, only one moth  
pollinated species has been observed and it has a pale pouched corolla (Fig. 1). All analyses  
126 were performed (1) using only species with confirmed pollinator information and (2) also  
adding species with inferred strategies. We followed the taxonomy of Skog (2012) except for  
recent modifications in the *Gesneria viridiflora* complex (unpublished data).

### 129 Molecular methods

A total of 94 specimens were included in the phylogenetic analyses (supplementary Table S3).  
*Koehleria* sp. ‘Trinidad’ (tribe Gesnerieae) and *Henckelia malayana* (tribe Trichosporeae)  
132 were included as outgroups. DNA was extracted using the plant DNA extraction kits from

135 QIAGEN (Toronto, Ontario) or BioBasics (Markham, Ontario). Five nuclear genes were amplified and sequenced: *CYCLOIDEA*, *CHI*, *UF3GT*, *F3H*, *GAPDH*. The first four are  
138 unlinked (unpublished linkage map), whereas no data is available for *GAPDH*. Primer sequences and PCR conditions can be found in supplementary Table S4. Sequencing reactions were performed by the Genome Quebec Innovation Centre and run on a 3730xl DNA Analyzer (Applied Biosystems). Sequences from both primers were assembled into contigs and corrected manually in Geneious vers. 1.8. DNA sequences generated for this study were augmented with previously published sequences (supplementary Table S3).

## 141 **Phylogenetic analyses**

Gene sequences were aligned using MAFFT (Kato and Standley, 2013). Ambiguous alignment sections in intron regions of *CHI* and *GAPDH* were removed using gblocks (Castresana, 144 2000) with the default settings. Alignments were verified by eye and no obviously misaligned region remained after treatment with gblocks. Substitution models were selected by Akaike Information Criterion (AIC) with jModeltest 2 (Darriba et al., 2012) using an optimized  
147 maximum likelihood tree. A species tree was reconstructed using \*BEAST in BEAST ver. 1.8.2 (Drummond et al., 2012). A Yule prior was chosen for the tree, a lognormal relaxed molecular clock for gene trees, and a gamma (2,1) prior for gene rates. Other parameters  
150 were left to the default settings. Three independent Markov Chain Monte Carlo (MCMC) analyses of  $1 \times 10^8$  generations were performed, sampling trees and parameters every 10,000 generations. Convergence of the runs was reached for parameter values, tree topology and  
153 clade posterior probabilities. The first  $2 \times 10^7$  generations were discarded as burnin and the remaining trees were combined for the analyses. The maximum clade credibility tree with median node heights was used for graphical representation.

## 156 **Geometric morphometric analyses**

Six landmarks and 26 semi-landmarks were positioned on photographs using tpsDig2 (Rohlf, 2010). Two landmarks were positioned at the base of the corolla, two at the tips of the petal  
159 lobes, and two at the base of the petal lobes, which generally corresponds to the corolla tube



opening. The semi-landmarks were then positioned at equal distance along the curve of the corolla (13 on each side) between the landmarks at the base of the corolla and at the base of the petal lobes. The sepals were present on most of the pictures. The landmark data was imported in R (R core team, 2014) where it was transformed by generalized Procrustes analysis using the `geomorph` R package (Adams and Otárola-Castillo, 2013). The semi-landmarks on curves were slid along their tangent directions during the superimposition by minimizing the Procrustes distance between the reference and target specimen (Bookstein, 1997). Size was not considered in the analyses because we were interested in shape and because a scale was not available for all specimens. Because the actinomorphic flowers of bee pollinated species (*Bellonia ssp.*) do not allow homologous placement of landmarks, these were dropped from the morphometric analyses.

Landmarks were positioned twice for each photograph and a Procrustes ANOVA quantified the variance explained by these technical replicates, which were combined for the remaining analyses. We also used a Procrustes ANOVA to quantify the variation among the replicated photographs of the same flowers; these replicates were not included in the final analyses. The Procrustes aligned specimens were projected into the tangent space, hereafter the morphospace, using Principal Component Analysis (PCA) of the covariance matrix using the `prcomp` function in R.

To characterize the total morphological variation for each pollination strategy, we estimated the distance of the mean corolla shape of each species to the pollinator strategy centroid in multivariate space and tested if these distances were different for the different pollination strategies using the `betadisper` function of the `vegan` package in R (Oksanen et al., 2017). The differences were tested by ANOVA. We also partitioned the variation into intraspecific and interspecific components for each pollination strategy using Procrustes ANOVA, reporting adjusted  $R^2$  values.

Morphological integration (Klingenberg, 2013) was quantified using the variance of the eigenvalues of a PCA on the covariance matrix (Pavlicev et al., 2009; Klingenberg, 2013), scaling the eigenvalues by the total variance of the sample to get an index independent of the total sample variation (Young, 2006). This was estimated on all individuals for the hummingbird and mixed-pollination species. Bat specialists were omitted from this analysis

because there were too few species to give a result comparable to the other pollination strategies.

## 192 **Ancestral states reconstruction**

Ancestral state reconstruction was performed to estimate the probability of all pollination strategy states for all nodes of the phylogeny. The best transition model was first selected  
195 by second order AIC (AICc) with the `geiger` R package (Harmon et al., 2008). Eight models selected based on biological relevance were compared. The Equal Rate (ER), Symmetric (SYM) and All Rates Different (ARD) were tested with modified versions that give a single rate to and from the moth and bee states (ER.2, SYM.2, and ARD.2). In addition, a  
198 4-rate model was tested where rates differed according to the actual state and a single rate to and from the bee and moth states, and finally a 3-rate model with one rate for transitions from and to bee and moth states, one from hummingbirds to bats or mixed-pollination,  
201 and a third from bat or mixed-pollination to all states except bee or moth. Using the best model, the joint ancestral state probabilities were estimated using stochastic character mapping (Huelsenbeck et al., 2003) on the maximum clade credibility tree with 2000 simulated  
204 character histories. When estimating ancestral states with only species with confirmed pollinators, the other species were given equal prior probabilities in the simulations. To estimate the number of transitions between states while accounting for phylogenetic uncertainty, 500  
207 character histories were simulated on 2000 species trees randomly sampled from the posterior distribution from the species tree search using the `phytools` R package. The median number of transitions between all states from all simulated character histories were reported as well  
210 as 95% credible intervals.

## **Evolutionary constraints on flower shape**

213 Given the nature of the hypotheses tested, two types of evolutionary models based on the Brownian motion (BM) and the Ornstein-Uhlenbeck (OU) stochastic processes were considered. BM models the accumulation of independent and infinitesimal stochastic phenotypic  
216 changes (controlled by the drift rate parameter  $\sigma^2$ ) along the branches of a phylogeny; it can

approximate various scenarios of phenotypic evolution such as drift, fluctuating directional selection or punctuated change (Felsenstein, 1985; Hansen and Martins, 1996; O’Meara et al., 219 2006). In contrast, the OU process models selection toward a common optimal trait value (Felsenstein, 1988; Hansen and Martins, 1996) and adds to the BM model a selection parameter  $\alpha$  that determines the strength of selection towards an optimal trait  $\theta$  (details on the 222 models can be found in Hansen and Martins, 1996; Butler and King, 2004; Beaulieu et al., 2012). When the strength of selection is null ( $\alpha = 0$ ), the OU process reduces to BM. These models can be made more complex, for instance by allowing parameters to vary in differ- 225 ent parts of the tree (selective regimes - e.g., Butler and King, 2004; O’Meara et al., 2006; Beaulieu et al., 2012) and are therefore useful for characterizing the evolutionary constraints of the pollination strategies.

228 Generalist pollination is hypothesized to promote phenotypic diversification (disparity) of corolla shape because it is thought to be under weaker selection (Johnson and Steiner, 2000), but also because of the spatio-temporal variation in pollinator abundance that could result in 231 fluctuating selection pressures (Herrera, 1988) or in a variety of species- or population-specific adaptive peaks (see Discussion). As such, mixed-pollination species are expected to best fit a BM process. In contrast, due to their adaptation to a single functional pollinator, pollination 234 specialists are expected to show smaller variation around a better defined shape optimum and thus fit an OU process. However, BM and OU processes can be difficult to distinguish, and an OU process can best fit the data for other reasons such as measurement error (Silvestro et al., 237 2015), bounded trait variation (Boucher and Démercy, 2016) or small sample sizes (Cooper et al., 2016). In contrast, OU models are less likely to be selected when analyzing the primary axes of variation from a PCA (Uyeda et al., 2015). Therefore, prediction of higher phenotypic 240 disparity is often better assessed through evaluation of parameters estimated under OU or BM for species pollinated by different functional groups of pollinators. For instance, with the BM process, the drift rate ( $\sigma^2$ ) describes the accumulation of phenotypic variance over the tree and 243 is therefore tightly related to phenotypic disparity (O’Meara et al., 2006; Thomas et al., 2006; Price et al., 2013). Following our hypothesis of lower phenotypic disparity for pollination specialists, we predict they should have a smaller  $\sigma^2$  compared to mixed-pollination species. 246 Similarly, under an OU model, the stationary variance around an optimum, expressed as

$\sigma^2/2\alpha$  for the univariate case, is also tightly related to phenotypic disparity. We thus expect  
pollination specialists to be associated with stronger corolla shape constraints (i.e., higher  
249  $\alpha$  values) and smaller stationary variances compared to mixed-pollination species in models  
where either  $\alpha$  or  $\sigma^2$  vary between strategies (see below). Finally, we expect phenotypic  
evolutionary correlations between traits inferred from multivariate comparative models to be  
252 higher in pollination specialists (i.e., higher phenotypic integration, see for instance Revell  
and Collar, 2009).

We evaluated and compared the model fit and parameter estimates with the predictions  
255 of our hypotheses using univariate and multivariate models because they allow investigating  
different aspects of the data. Univariate models allowed us to fit a greater range of evolution-  
ary models that are not yet implemented in multivariate approaches and allow investigating  
258 if different shape components evolved under similar constraints. In contrast, multivariate  
models allow to fit an evolutionary model on several shape components at once and also  
allow to investigate patterns of evolutionary correlation among traits for the different polli-  
261 nation strategies; that is, studying phenotypic integration in an evolutionary context. For  
univariate models, we fitted BM models with one drift rate for the whole tree (BM1) and  
with one rate per regime (BMV), but also versions that allow different ancestral states for  
264 the different regimes (O’Meara et al., 2006; Thomas et al., 2009); model BM1m has distinct  
trait means per regime but a single drift rate across the tree, while BMVm has distinct means  
and drift rates for each regime. We also fitted different variants of the OU models (Beaulieu  
267 et al., 2012): with a single optimum  $\theta$  (OU1), with different optima for lineages with different  
pollination strategies (OUM), different  $\theta$  and selective strength  $\alpha$  (OUMA), different  $\theta$  and  
rates of stochastic motion  $\sigma^2$  (OUMV), or different  $\theta$ ,  $\alpha$  and  $\sigma^2$  (model OUMVA) for the  
270 different pollination strategies. We also considered ecological release models, in which one  
regime on the tree is evolving under BM and the other under an OU process, either with  
a shared drift rate  $\sigma^2$  (OUBM and BMOU) or with their own drift rates (models OUBMi  
273 and BMOUi) which are sometimes called ecological release and radiate models (see Slater,  
2013). The model OUBM considers hummingbird specialists to be evolving under an OU  
model whereas the mixed-pollination species are evolving under a BM model, and vice versa.  
276 Several multivariate models were also considered: BM1, BMV, BM1m, BMVm, OU1, OUM,

OUBM, BMOU, OUBMi, and BMOUi. The multivariate OU models allowing different constraints on different regimes (OUMA, OUMV, OUMVA) are not implemented yet and thus  
279 we can not estimate regime specific evolutionary covariance (or correlation) matrices. However, we expect such models to be over-parameterized with respect to the number of species considered in our study.

282 In the remaining, we therefore consider the comparison of phenotypic evolutionary correlations obtained from the  $\sigma^2$  correlation matrices of the multivariate BM models only. Yet, focussing on the interpretation of parameters obtained under the BM processes can be misleading if BM is a poor descriptor of the phenotypic evolution (see for instance Price et al.,  
285 2013). To make sure this did not affect our estimates, we simulated datasets using a OUM model on 100 trees randomly selected from the posterior distribution using the parameters  
288 estimated from the observed data. We then fitted these simulated data with the BMVm model to obtain  $\sigma^2$  correlation matrices that were compared with the original  $\sigma^2$  correlation matrices.

291 The models were fitted for the first three principal components of the morphospace using the R packages `mvMORPH` (Clavel et al., 2015) and `OUwie` (Beaulieu et al., 2012). The models were fitted on a sample of 1000 trees from the posterior distribution of species trees on  
294 which the character history was inferred by one instance of stochastic mapping (Huelsenbeck et al., 2003) using maximum likelihood in the `phytools` R package (Revell, 2012). This accounts for phylogenetic uncertainty and the stochasticity of the character state reconstructions (Revell, 2013). All the trees were re-scaled to unit height. Intraspecific variation was  
297 taken into account by using the sampling variance (the squared standard error) of species as measurement error in model fitting; species without biological replicates were given the mean squared standard error of species with the same pollination strategy. The models were compared using  $AICc$  weights that can be roughly considered as the relative weight of evidence in favour of a model given a set of models (Burnham and Anderson, 2002). The analyses  
303 were performed with inferred pollination strategies as well as with species with confirmed pollination strategies only. Note that because there were few confirmed bat pollinated species and a single moth pollinated species, species with these pollination strategies were excluded  
306 from the analyses. However, the inclusion of bat pollinated species in the univariate models

did not affect the conclusions (data not shown). The data and scripts used to replicate all analyses are available as supplementary information.

## 309 Results

### Phylogeny

The species phylogeny showed that the bee pollinated genus *Bellonia* is sister to the rest of  
312 the subtribe, and the subtribe (*Bellonia* + *Gesneria* + *Rhytidophyllum*) received a posterior probability of 1 (not shown). *Rhytidophyllum* and *Gesneria* were found to form distinct clades, although *Gesneria* received weaker support (Fig. 2). This reinforces the distinction  
315 between these two genera, which has been debated over the years. There is one exception, *Rhytidophyllum bicolor*, which is included for the first time in a molecular phylogeny and that falls within *Gesneria*. The taxonomic name of this species will have to be reconsidered.  
318 Several branches show strong clade posterior probabilities, but some had less support due to lack of phylogenetic signal or conflict between gene trees, indicating the importance of incorporating phylogenetic uncertainty in the following analyses.

321 The best character evolutionary model (smallest *AICc*) was the 3 rates model with one rate for transitions from and to the bee and moth states, one from hummingbirds to bats or mixed-pollination, and a third from bat or mixed-pollination to all states except bee and  
324 moth. Ancestral state reconstruction (Fig. 2) suggests that the hummingbird pollination is the most likely ancestral state for the *Gesneria* clade, although it is only slightly more likely than an ancestral mixed-pollination strategy. In contrast, the mixed-pollination strategy is  
327 the most probable ancestral state for the *Rhytidophyllum* clade. A hummingbird pollinated ancestor for the subtribe is more probable, but only very slightly. This reflects the difficulty in estimating the ancestral states for nodes near the root of a phylogeny (Gascuel and Steel,  
330 2014). The ancestral state reconstruction with the inferred pollination strategies (Fig. S1) were highly similar to those of Fig. 2.

333 Estimation of the number of transitions supports several transitions between the bat, the mixed-pollination and the hummingbird strategies (Table 1). The number of transition from mixed-pollination to hummingbird and from mixed-pollination to bat was slightly higher than

**Table 1:** Number of transitions between the different pollination strategies according to stochastic mapping. The median values obtained from the character simulations over the posterior distribution of species tree is reported as well as 95% credible intervals. Ancestral states are in rows.

|                   | bat               | bee               | hummingbird       | mixed-pollination | moth              |
|-------------------|-------------------|-------------------|-------------------|-------------------|-------------------|
| bat               | –                 | 0.30 [0.22, 0.37] | 3.31 [2.79, 3.88] | 3.52 [3.10, 3.91] | 0.26 [0.17, 0.31] |
| bee               | 0.07 [0.02, 0.12] | –                 | 0.07 [0.03, 0.11] | 0.08 [0.03, 0.14] | 0.04 [0.03, 0.07] |
| hummingbird       | 2.61 [2.16, 3.03] | 0.61 [0.52, 0.71] | –                 | 2.52 [2.10, 2.89] | 0.84 [0.71, 0.98] |
| mixed-pollination | 4.30 [3.68, 4.77] | 0.36 [0.29, 0.43] | 4.87 [4.14, 5.51] | –                 | 0.31 [0.21, 0.37] |
| moth              | 0.04 [0.02, 0.06] | 0.08 [0.04, 0.11] | 0.05 [0.03, 0.08] | 0.04 [0.02, 0.07] | –                 |

from bat to mixed-pollination and bat to hummingbird, which was also slightly higher than  
336 the number of transitions from hummingbird to bats and hummingbird to mixed-pollination  
(Table 1). However, because the confidence intervals largely overlap, we can conclude that the  
number of transitions between these three main pollination strategies are not significantly  
339 different. The results were almost identical when analyses were performed with inferred  
pollination strategies (Supplementary Table S5). These estimates are similar to those of  
Martén-Rodríguez et al. (2010), although they found fewer reversals to hummingbirds in  
342 their study. Overall, these results confirm multiple evolutionary origins for all pollination  
strategies except for the bee and moth (95 % CI always > 2; Table 1).

## Corolla shape

345 We found only 0.15% of variation between independent pictures of the same flower in the  
replication experiment, which is lower than the variation involved in the landmark positioning  
(0.81%). Therefore, we conclude that the error included in the data by the picture acquisition  
348 was minimal. Similarly, because the technical replicates accounted for only 0.56% of the total  
variance in the final dataset, the mean shape between replicates was used for the remaining  
analyses.

351 The morphospace explained 79% of the total shape variance in the first three axes. The  
first principal component (PC) represents 53.6% of the variance and is characterized by  
campanulate vs. tubular corollas (Fig. 3A), broadly differentiating hummingbird specialists  
354 from the other species. This concurs with a previous study that showed that this was indeed  
the main characteristic differentiating the hummingbird pollination strategy from the bat  
and the mixed-pollination strategies (Martén-Rodríguez et al., 2009). PC2 explains 20.6% of  
357 the variance and is characterized by corolla curvature and distinguished the moth pollinated

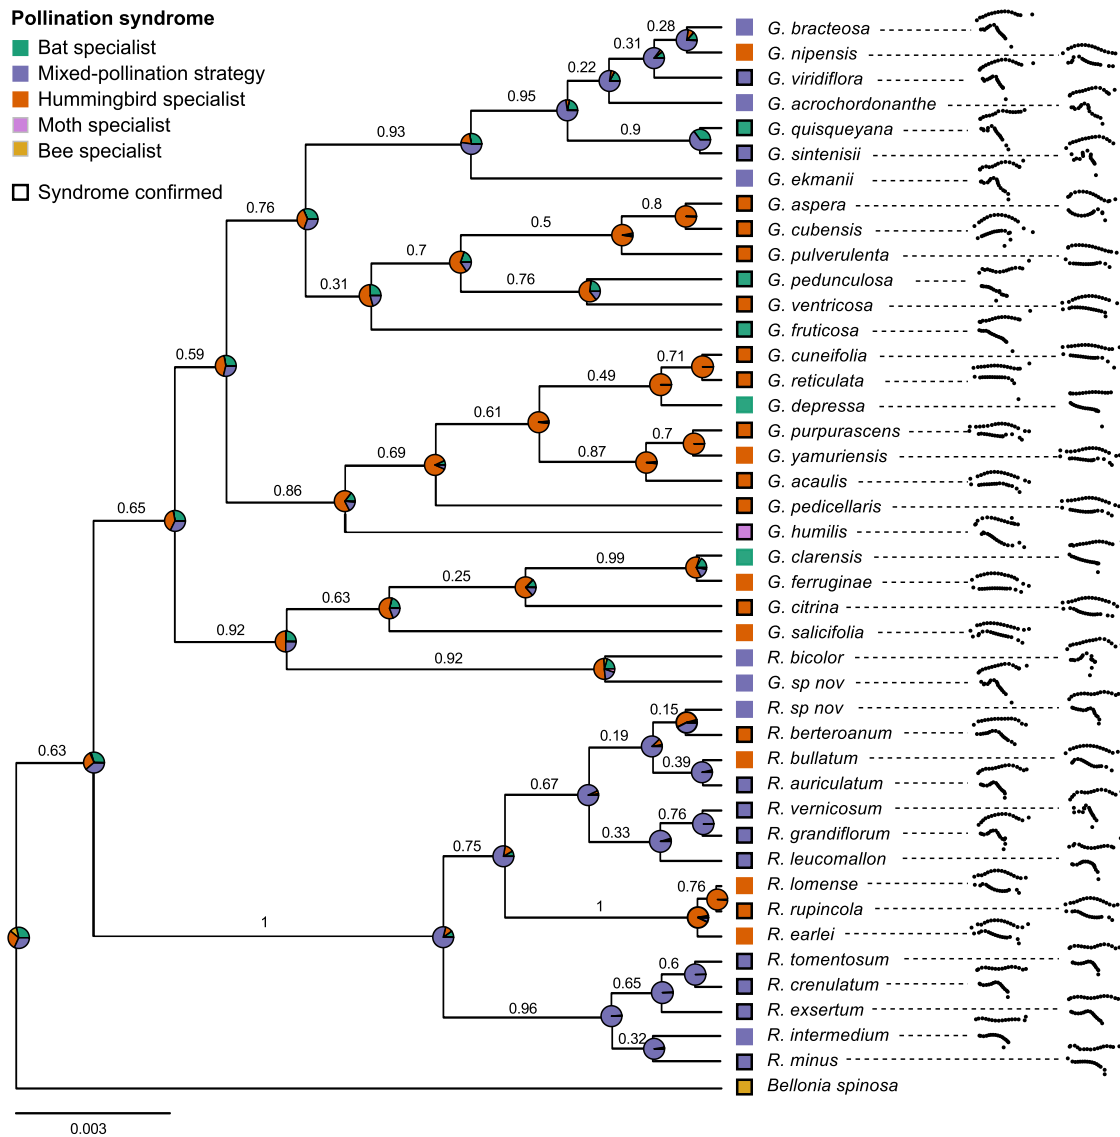

**Figure 2:** Species phylogeny showing mean corolla shapes (after Procrustes analysis). Pollination strategies are shown with those that have been confirmed indicated by a black contour. Pie charts represent the joint probability of each state at nodes as estimated by stochastic mapping from only species with confirmed pollinators. Clade posterior probabilities are shown above branches. Outgroup taxa are not shown.



*G. humilis*. The bat and the mixed-pollination strategies could not be differentiated with this PCA, but a second PCA that excluded moth and hummingbird pollinated species (both confirmed and inferred) found that the bat and mixed-pollination strategies were separated along PC3 that is characterized by a basal constriction in the corolla (Fig. 3B), a character known to distinguish bat pollinated species (that generally lack the constriction) from species with a mixed-pollination strategy (Martén-Rodríguez et al., 2009). The single bat pollinated species that groups with mixed-pollination species on this axis is *Gesneria quisqueyana* (see interactive supplementary figures for information on the individual and species positioning in the PCAs), which, in contrast to other bat pollinated species in the group, excludes hummingbirds during the day by actively closing its flowers (Martén-Rodríguez et al., 2009).

## Variation partitioning

The pollination strategies did not have a significantly different corolla variation among species (ANOVA:  $F = 1.92$ ,  $df = 2$ ,  $p = 0.1654$ ). The partitioning of the shape variance for the different pollination strategies showed that the proportion of variance explained among species corresponded to 81.4% ( $p < 0.001$ ) for hummingbird pollinated species, 91.3% ( $p = 0.22$ ) for bat pollinated species and 50.4% ( $p < 0.001$ ) for mixed-pollination species. The result of the variance partitioning for the bat pollinated species should be interpreted with caution because there was only three species with less than two replicated individuals on average within species for this syndrome.

## Morphological integration

Flower components are generally well integrated as they develop, function and evolve jointly (Ashman and Majetic, 2006), a concept called morphological integration (reviewed in Klingenberg, 2013). A large morphological integration index supports important integration because morphological variation is concentrated in few principal components. The results showed that species with a mixed-pollination strategy had a slightly greater morphological integration (0.0069) than hummingbird pollinated species (0.0050).

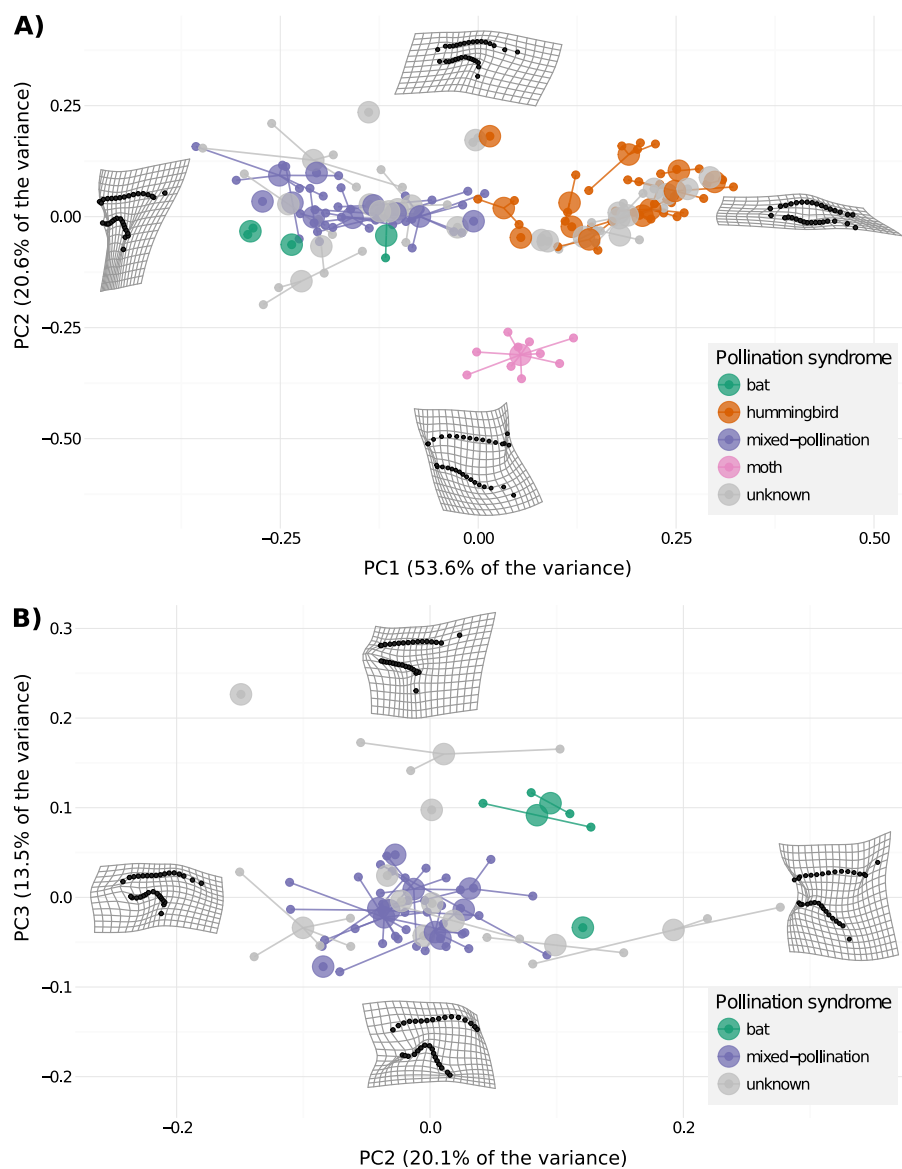

**Figure 3:** Principal component analyses showing the corolla shape morphospace for (A) all species and (B) species excluding hummingbird (both confirmed and inferred) and moth pollinated species. The large dots on the plot represent the species means, which are connected by a line to the floral shapes of the individuals belonging to the species (small dots). Thin-plate spline deformation grids show corolla shape variation along the principal components (plus or minus 2 standard deviation from the mean shape). *Bellonia spinosa* (bee pollinated) was not included in the morphometric analyses because it has a radial symmetry.

## 384 Evolutionary models

### Univariate models

For PC1 that captures variation in corolla opening, all models that received  $AICc$  weights  
387 greater than zero suggest that the hummingbird specialists and the mixed-pollination species  
differed in their mean shape as they all included distinct  $\theta$  for the two strategies (Table 2).  
The best models, OUM and BM1m ( $AICc$  weight of 0.48 and 0.35, respectively), suggest that  
390 the two pollination strategies had similar evolutionary phenotypic variance as they constrain  
them to have identical parameters. This trend is also supported by parameter estimates of  
supported models that allowed the strategies to differ in drift rates (BMVm) or stationary  
393 variance (OUMV, OUMA, OUMVA) as these estimates were very similar for the two strate-  
gies (Table 2). The phylogenetic half-time of the OUM model, which corresponds to the time  
required for the expected phenotype to move half-way towards the optimal shape from its  
396 ancestral state (Hansen, 1997), was of 0.009. Given that the trees were scaled to unit height,  
this small value imply either very strong selective pressure or a lack of phylogenetic corre-  
lation. The results of the analyses that included species with inferred pollination strategies  
399 were almost identical in terms of model selection and phenotypic disparity (Table S6).

The PC2 of the morphospace that represents variation in the curve of the corolla was found  
to best fit a OUBMi model ( $AICc$  weight = 0.72; Table 2), with the hummingbird pollinated  
402 species evolving under a OU model and the mixed-pollination species evolving under a BM  
model, each with their own drift rate implying that this model cannot be simply interpreted  
as reduced constraints for mixed-pollination species. Nevertheless, the model suggests that  
405 the pollination strategies have the same mean shape for PC2 and that the two pollination  
strategies have evolved under different types of constraints. The median phylogenetic half-  
time was of 0.02 for the hummingbird species, suggesting either very strong selective pressure  
408 or a lack of phylogenetic correlation. Parameter estimates for the other models, in particular  
the second best model OUMV ( $AICc$  weight = 0.15), also supported similar mean shapes  
for the two pollination strategies and suggest that hummingbird pollinated species have  
411 greater phenotypic disparity as they have a greater stationary variance than mixed-pollination  
species (Table 2). The median phylogenetic half-time for the OUMV model was estimated

**Table 2:** Parameter values of the univariate evolutionary models fitted on the first three principal components of the morphospace when only the species with confirmed pollinators were included in the analyses. Mean values from the posterior distribution of species trees are given for the AICc weights, whereas median values are given for the parameter estimates. Numbers in brackets indicate the 25% and the 75% quantiles. The best model for each PC is in bold. The  $\theta$  parameter indicate the global or regime means (ancestral states) for the BM-type and OUBM-type models, whereas it indicates the stationary optimum trait for the OU-type models.  $station_{hum}$  and  $station_{mix}$  are the stationary distributions of the hummingbird and mixed-pollination strategies.

| <b>PC1</b> |          |                         |                           |                               |                            |                            |                            |                            |                            |                               |
|------------|----------|-------------------------|---------------------------|-------------------------------|----------------------------|----------------------------|----------------------------|----------------------------|----------------------------|-------------------------------|
| Models     | p        | AICc weight             | $\theta_{hum}$            | $\theta_{mix}$                | $\sigma_{hum}^2$           | $\sigma_{mix}^2$           | $station_{hum}$            | $station_{mix}$            |                            |                               |
| BMI        | 2        | 0 [0,0]                 | 0.057 [0.05,0.066]        | 0.057 [0.05,0.066]            | 0.046 [0.037,0.074]        | 0.046 [0.037,0.074]        | -                          | -                          | -                          | -                             |
| BMV        | 3        | 0 [0,0]                 | 0.07 [0.011,0.113]        | 0.07 [0.011,0.113]            | 0.035 [0.02,0.093]         | 0.045 [0.026,0.086]        | -                          | -                          | -                          | -                             |
| BMIm       | 3        | 0.35 [0.02,0.68]        | 0.15 [0.144,0.155]        | -0.123 [-0.131,-0.112]        | 0.017 [0.013,0.023]        | 0.017 [0.013,0.023]        | -                          | -                          | -                          | -                             |
| BMVm       | 4        | 0.1 [0.01,0.17]         | 0.146 [0.138,0.153]       | -0.124 [-0.132,-0.112]        | 0.021 [0.014,0.031]        | 0.013 [0.012,0.016]        | -                          | -                          | -                          | -                             |
| OU1        | 3        | 0 [0,0]                 | 0.05 [0.039,0.057]        | 0.05 [0.039,0.057]            | 0.088 [0.061,0.197]        | 0.088 [0.061,0.197]        | 0.029 [0.029,0.031]        | 0.029 [0.029,0.031]        | 0.006 [0.006,0.006]        | 2.696 [1.443,4.635]           |
| <b>OUM</b> | <b>4</b> | <b>0.48 [0.11,0.84]</b> | <b>0.16 [0.152,0.163]</b> | <b>-0.155 [-0.156,-0.152]</b> | <b>0.859 [0.265,3.004]</b> | <b>0.859 [0.265,3.004]</b> | <b>0.006 [0.006,0.006]</b> | <b>0.006 [0.006,0.006]</b> | <b>0.006 [0.006,0.006]</b> | <b>2.684 [1.381,5.179]</b>    |
| OUMV       | 5        | 0.05 [0,0]              | 0.197 [0.18,0.222]        | -0.134 [-0.226,-0.094]        | 8.248 [3.772,23.45]        | 7.442 [2.802,21.646]       | 2.684 [1.381,5.179]        | 2.684 [1.381,5.179]        | 2.684 [1.381,5.179]        | 2.696 [1.443,4.635]           |
| OUMA       | 5        | 0.02 [0,0]              | 0.195 [0.178,0.23]        | -0.14 [-0.246,-0.09]          | 8.935 [3.876,19.47]        | 8.935 [3.876,19.47]        | 2.573 [1.857,3.386]        | 2.573 [1.857,3.386]        | 2.573 [1.857,3.386]        | 2.667 [2.107,3.739]           |
| OUMVA      | 6        | 0.01 [0,0]              | 0.195 [0.175,0.212]       | -0.141 [-0.257,-0.106]        | 7.756 [3.12,23.395]        | 6.743 [2.518,18.899]       | 2.439 [1.388,4.782]        | 2.439 [1.388,4.782]        | 2.439 [1.388,4.782]        | 3.018 [1.516,4.646]           |
| OUBMi      | 4        | 0 [0,0]                 | 0.125 [0.106,0.142]       | 0.125 [0.106,0.142]           | 0.252 [0.065,4.186]        | 0.042 [0.023,0.064]        | 0.009 [0.007,0.013]        | 0.009 [0.007,0.013]        | 0.009 [0.007,0.013]        | -                             |
| BMOU1      | 4        | 0 [0,0]                 | 0.038 [-0.03,0.092]       | 0.038 [-0.03,0.092]           | 0.04 [0.021,0.095]         | 0.06 [0.032,0.104]         | -                          | -                          | -                          | 460558.818 [0.017,182228.977] |
| OUBM       | 3        | 0 [0,0]                 | 0.135 [0.12,0.151]        | 0.135 [0.12,0.151]            | 0.073 [0.056,0.13]         | 0.073 [0.056,0.13]         | 0.007 [0.006,0.009]        | 0.007 [0.006,0.009]        | 0.007 [0.006,0.009]        | -                             |
| BMOU       | 3        | 0 [0,0]                 | 0.043 [-0.045,0.059]      | 0.043 [-0.045,0.059]          | 0.053 [0.037,0.107]        | 0.053 [0.037,0.107]        | -                          | -                          | -                          | 18437.122 [0.009,539.877]     |

  

| <b>PC2</b>   |          |                         |                               |                               |                           |                      |                            |                            |                            |                            |
|--------------|----------|-------------------------|-------------------------------|-------------------------------|---------------------------|----------------------|----------------------------|----------------------------|----------------------------|----------------------------|
| Models       | p        | AICc weight             | $\theta_{hum}$                | $\theta_{mix}$                | $\sigma_{hum}^2$          | $\sigma_{mix}^2$     | $station_{hum}$            | $station_{mix}$            |                            |                            |
| BMI          | 2        | 0 [0,0]                 | -0.035 [-0.037,-0.032]        | -0.035 [-0.037,-0.032]        | 0.021 [0.013,0.038]       | 0.021 [0.013,0.038]  | -                          | -                          | -                          | -                          |
| BMV          | 3        | 0.04 [0,0.04]           | -0.035 [-0.041,-0.025]        | -0.035 [-0.041,-0.025]        | 0.036 [0.021,0.065]       | 0 [0,0]              | -                          | -                          | -                          | -                          |
| BMIm         | 3        | 0 [0,0]                 | -0.031 [-0.035,-0.028]        | -0.041 [-0.048,-0.036]        | 0.021 [0.013,0.038]       | 0.021 [0.013,0.038]  | -                          | -                          | -                          | -                          |
| BMVm         | 4        | 0.01 [0,0.01]           | -0.028 [-0.036,-0.02]         | -0.038 [-0.046,-0.026]        | 0.036 [0.02,0.064]        | 0 [0,0]              | -                          | -                          | -                          | -                          |
| OU1          | 3        | 0 [0,0]                 | -0.036 [-0.036,-0.036]        | -0.036 [-0.036,-0.036]        | 0.972 [0.18,1.104]        | 0.972 [0.18,1.104]   | 0.003 [0.003,0.003]        | 0.003 [0.003,0.003]        | 0.003 [0.003,0.003]        | 0.003 [0.003,0.003]        |
| OUM          | 4        | 0 [0,0]                 | -0.042 [-0.044,-0.042]        | -0.027 [-0.027,-0.026]        | 0.499 [0.107,1.041]       | 0.499 [0.107,1.041]  | 0.003 [0.003,0.003]        | 0.003 [0.003,0.003]        | 0.003 [0.003,0.003]        | 0.003 [0.003,0.003]        |
| OUMV         | 5        | 0.15 [0.01,0.28]        | -0.026 [-0.039,-0.014]        | -0.017 [-0.04,-0.01]          | 10.239 [5.932,18.219]     | 0.018 [0.072]        | 1.663 [1.314,2.512]        | 1.663 [1.314,2.512]        | 1.663 [1.314,2.512]        | 0.003 [0.003,0.003]        |
| OUMA         | 5        | 0 [0,0]                 | -0.024 [-0.04,-0.015]         | -0.016 [-0.038,-0.005]        | 6.319 [3.531,11.251]      | 6.319 [3.531,11.251] | 0.868 [0.671,1.145]        | 0.868 [0.671,1.145]        | 0.868 [0.671,1.145]        | 0.003 [0.003,0.003]        |
| OUMVA        | 6        | 0.02 [0,0.03]           | -0.025 [-0.038,-0.013]        | -0.017 [-0.041,-0.011]        | 13.96 [6.714,26.595]      | 0.027 [0.001,1.106]  | 1.772 [1.316,3.017]        | 1.772 [1.316,3.017]        | 1.772 [1.316,3.017]        | 0.004 [0.004,0.004]        |
| <b>OUBMi</b> | <b>4</b> | <b>0.72 [0.53,0.93]</b> | <b>-0.043 [-0.045,-0.041]</b> | <b>-0.043 [-0.045,-0.041]</b> | <b>0.305 [0.132,0.93]</b> | <b>0 [0,0]</b>       | <b>0.004 [0.004,0.004]</b> | <b>0.004 [0.004,0.004]</b> | <b>0.004 [0.004,0.004]</b> | <b>0.004 [0.004,0.004]</b> |
| BMOU1        | 4        | 0.01 [0,0.01]           | -0.035 [-0.041,-0.025]        | -0.035 [-0.041,-0.025]        | 0.036 [0.021,0.065]       | 0.001 [0,0.001]      | -                          | -                          | -                          | 0 [0,0]                    |
| OUBM         | 3        | 0 [0,0]                 | -0.044 [-0.05,-0.035]         | -0.044 [-0.05,-0.035]         | 0.03 [0.019,0.064]        | 0.03 [0.019,0.064]   | 0.003 [0.003,0.005]        | 0.003 [0.003,0.005]        | 0.003 [0.003,0.005]        | -                          |
| BMOU         | 3        | 0.03 [0,0.02]           | -0.029 [-0.038,-0.025]        | -0.029 [-0.038,-0.025]        | 0.036 [0.021,0.064]       | 0.036 [0.021,0.064]  | -                          | -                          | -                          | 0 [0,0]                    |

  

| <b>PC3</b>  |          |                         |                            |                           |                              |                            |                            |                            |                            |                            |
|-------------|----------|-------------------------|----------------------------|---------------------------|------------------------------|----------------------------|----------------------------|----------------------------|----------------------------|----------------------------|
| Models      | p        | AICc weight             | $\theta_{hum}$             | $\theta_{mix}$            | $\sigma_{hum}^2$             | $\sigma_{mix}^2$           | $station_{hum}$            | $station_{mix}$            |                            |                            |
| BMI         | 2        | 0.06 [0.01,0.09]        | 0.017 [0.015,0.019]        | 0.017 [0.015,0.019]       | 0.005 [0.004,0.006]          | 0.005 [0.004,0.006]        | -                          | -                          | -                          | -                          |
| BMV         | 3        | 0.02 [0,0.03]           | 0.017 [0.015,0.019]        | 0.017 [0.015,0.019]       | 0.005 [0.004,0.006]          | 0.005 [0.004,0.006]        | -                          | -                          | -                          | -                          |
| BMIm        | 3        | 0.02 [0,0.03]           | 0.023 [0.022,0.026]        | 0.004 [0.001,0.007]       | 0.005 [0.004,0.005]          | 0.005 [0.004,0.005]        | -                          | -                          | -                          | -                          |
| BMVm        | 4        | 0.01 [0,0.01]           | 0.024 [0.022,0.026]        | 0.004 [0.001,0.007]       | 0.005 [0.004,0.006]          | 0.005 [0.004,0.006]        | -                          | -                          | -                          | -                          |
| OU1         | 3        | 0.18 [0.04,0.27]        | 0.013 [0.013,0.016]        | 0.013 [0.013,0.016]       | 0.036 [0.017,0.739]          | 0.036 [0.017,0.739]        | 0.002 [0.002,0.002]        | 0.002 [0.002,0.002]        | 0.002 [0.002,0.002]        | 0.002 [0.002,0.002]        |
| OUM         | 4        | 0.05 [0.01,0.07]        | 0.015 [0.014,0.019]        | 0.012 [0.011,0.013]       | 0.03 [0.017,0.713]           | 0.03 [0.017,0.713]         | 0.002 [0.002,0.002]        | 0.002 [0.002,0.002]        | 0.002 [0.002,0.002]        | 0.002 [0.002,0.002]        |
| <b>OUMV</b> | <b>5</b> | <b>0.36 [0.18,0.53]</b> | <b>0.027 [0.025,0.029]</b> | <b>0.014 [0.01,0.022]</b> | <b>13.351 [7.115,26.325]</b> | <b>3.692 [2.121,6.126]</b> | <b>1.033 [0.744,1.621]</b> | <b>1.033 [0.744,1.621]</b> | <b>1.033 [0.744,1.621]</b> | <b>0.291 [0.215,0.359]</b> |
| OUMA        | 5        | 0.12 [0.04,0.17]        | 0.026 [0.022,0.028]        | 0.017 [0.01,0.024]        | 4.885 [3.11,13.095]          | 4.885 [3.11,13.095]        | 0.505 [0.395,0.728]        | 0.505 [0.395,0.728]        | 0.505 [0.395,0.728]        | 0.291 [0.215,0.359]        |
| OUMVA       | 6        | 0.04 [0.02,0.06]        | 0.027 [0.024,0.029]        | 0.014 [0.009,0.022]       | 6.412 [4.403,19.508]         | 2.492 [1.504,5.957]        | 0.734 [0.556,1.073]        | 0.734 [0.556,1.073]        | 0.734 [0.556,1.073]        | 0.264 [0.196,0.375]        |
| OUBMi       | 4        | 0.01 [0,0.01]           | 0.015 [0.013,0.018]        | 0.015 [0.013,0.018]       | 0.005 [0.004,0.006]          | 0.005 [0.004,0.006]        | -                          | -                          | -                          | -                          |
| BMOU1       | 4        | 0.04 [0.01,0.04]        | 0.015 [0.014,0.017]        | 0.015 [0.014,0.017]       | 0.005 [0.004,0.006]          | 0.041 [0.021,0.233]        | -                          | -                          | -                          | 0.001 [0.001,0.001]        |
| OUBM        | 3        | 0.03 [0,0.04]           | 0.017 [0.014,0.02]         | 0.017 [0.014,0.02]        | 0.007 [0.006,0.009]          | 0.007 [0.006,0.009]        | -                          | -                          | -                          | -                          |
| BMOU        | 3        | 0.07 [0.01,0.07]        | 0.015 [0.013,0.017]        | 0.015 [0.013,0.017]       | 0.006 [0.005,0.008]          | 0.006 [0.005,0.008]        | -                          | -                          | -                          | 0.001 [0.001,0.001]        |

to be 0.23, suggesting moderate constraints on corolla shape. The analyses including species  
414 with inferred pollination strategies best supported a OU1 model ( $AICc$  weights = 0.69;  
Table S6) indicating a lack of evidence for different constraints or disparity for the two  
strategies. But in models where the evolutionary rate of stationary variance was allowed to  
417 vary between strategies, the hummingbird pollinated species showed higher variance than  
the mixed-pollinated species (Table S6).

The PC3 that represents variation in the reflexion of the petal lobes was found to best  
420 fit a OUMV model ( $AICc$  weight = 0.36), although models OU1 and OUMA also received  
considerable weights ( $AICc$  weights of 0.18 and 0.12, respectively; Table 2). All three models  
suggest that this shape component tend to stay closer to the evolutionary mean than would  
423 be expected under a BM model. The OU1 suggests that the pollination strategies have the  
same mean shape, whereas the OUM and OUMV models suggest different mean shapes,  
although parameter estimates for these later models showed that the mean shapes for both  
426 strategies are not very far from each other (Table 2). The models OUMV and OUMA suggest  
different shape disparity with the hummingbird specialists having a higher stationary variance  
than mixed-pollination species. The models OUMV, OU1 and OUMA all suggested strong  
429 constraints with estimated phylogenetic half-times of 0.11, 0.08, and 0.14, respectively. In  
analyses with species with inferred pollination strategies, the OU1 model received the highest  
weight (0.30), although several models received weights greater than 0.05 (Table S6). As  
432 for the analyses with only species with confirmed pollination strategies, the hummingbird  
pollinated species showed higher stationary variance in models in which this parameter was  
allowed to vary between strategies (Table S6).

435 In some instances, the models OU1 and OUM did not always converge to the maximum  
likelihood solution when fitted with `OUwie`, especially for PC1. This is why we always fitted  
these models with `mvMORPH`, which is also faster. Similarly, the models OUMV, OUMA, and  
438 OUMVA showed relatively poor convergence and should be interpreted with caution.

## Multivariate models

The multivariate analyses supported OUM as the best fitting model ( $AICc$  weight = 0.60;  
441 Table 3). This model suggests that the shape components have different evolutionary means

for the two pollination strategies and that there is an evolutionary force that maintains the corolla shape closer to this evolutionary mean than would be expected under a BM model.

444 The shape means estimated under the multivariate OUM model for each PC were very similar to that of the univariate estimates, as were the estimates of the stationary variance and phylogenetic halftimes (compare Tables 2 and 4). The stationary variance estimates  
447 were also similar to the observed variance among species for hummingbird pollinated species (PC1: 0.0068, PC2: 0.0049, PC3: 0.0041) and mixed-pollinated species (PC1: 0.0075, PC2: 0.0014, PC3: 0.0016), suggesting that the model is very close to be stationary.

450 Because the current implementation do not allow the estimation of regime-specific evolutionary correlations between traits under the multivariate OUM model, we looked at the evolutionary correlations between drift rates ( $\sigma^2$ ) under the BMVm model, which was the  
453 third best supported model ( $AICc$  weight = 0.13; Table 3), to estimate the morphological integration for the two pollination strategies. The evolutionary correlations between shape components were always greater for the mixed-pollination strategy in terms of absolute cor-  
456 relation, although there is some uncertainty in these estimates as evident from the 50% posterior intervals (Fig. 4). Furthermore, the better support for the OUM and BM1m models also suggests that differences between pollination strategies are probably marginal or that  
459 we lack statistical power to detect significant differences. Because these correlations were obtained on a BMVm model whereas a OUM model was the one that received the highest support, there is a risk that the younger mixed-pollination clades may appear to have evolved  
462 faster under the BMVm model (Price et al., 2013), which could in turn affect the observed correlations. However, this does not seem to be the case as the correlations estimated on data simulated with the OUM model were similar between pollination strategies (Fig. 4), reject-  
465 ing the possibility that the greater absolute correlations observed for the mixed-pollination strategy were due to model mis-specification. The multivariate results obtained when species with inferred pollinators were included were similar, with even more support for the OUM  
468 model ( $AICc$  weight = 1; Table S8, S9). However, the correlation between traits suggest phenotypic integration of more similar amplitude for the two pollination strategies with inferred pollinators (Fig. S2); these differences could be due to the small sample sizes as such  
471 correlations are difficult to estimate accurately.

**Table 3:** Model performance with the multivariate evolutionary models fitted on the first three principal components of the morphospace when only confirmed species are included in the analyses. The mean values obtained from the posterior distribution of species trees are given; numbers in brackets indicate the 25% and the 75% quantiles. The best model is in bold.

| Models     | $\log Lik$                 | Parameters | $AICc$ weight           |
|------------|----------------------------|------------|-------------------------|
| BM1        | 67.98 [63.43,76.25]        | 9          | 0.00 [0.00,0.00]        |
| BMV        | 80.44 [76.94,86.18]        | 15         | 0.00 [0.00,0.00]        |
| BM1m       | 78.52 [72.7,86.95]         | 12         | 0.24 [0.00,0.45]        |
| BMVm       | 90.47 [85.96,96.59]        | 18         | 0.13 [0.00,0.12]        |
| OU1        | 82.30 [74.47,87.04]        | 15         | 0.02 [0.00,0.00]        |
| <b>OUM</b> | <b>96.24 [93.47,98.18]</b> | <b>18</b>  | <b>0.60 [0.03,1.00]</b> |
| OUBM       | 77.17 [74.14,82.47]        | 15         | 0.00 [0.00,0.00]        |
| BMOU       | 80.47 [76.97,85.85]        | 15         | 0.01 [0.00,0.00]        |
| OUBMi      | 95.24 [93.99,97.05]        | 21         | 0.01 [0.00,0.00]        |
| BMOUi      | 83.71 [80.01,89.11]        | 21         | 0.00 [0.00,0.00]        |

**Table 4:** Model parameters for the multivariate OUM model, which was the model that received the highest  $AICc$  weight (Table 3). The mean values obtained from the posterior distribution of species trees are given; numbers in brackets indicate the 25% and the 75% quantiles. The complete stationary variance matrix is given in Table S7.

| parameters            | PC1                    | PC2                    | PC3                 |
|-----------------------|------------------------|------------------------|---------------------|
| $\theta_{hum}$        | 0.161 [0.152,0.166]    | -0.043 [-0.046,-0.042] | 0.013 [0.009,0.015] |
| $\theta_{mix}$        | -0.156 [-0.159,-0.154] | -0.026 [-0.027,-0.023] | 0.013 [0.012,0.02]  |
| $\sigma^2$            | 1.198 [0.135,0.135]    | 1.328 [0.184,0.184]    | 0.757 [0.005,0.005] |
| Phylogenetic halftime | 0.002 [0.001,0.003]    | 0.01 [0.003,0.031]     | 0.101 [0.01,0.194]  |
| Stationary variance   | 0.006 [0.005,0.006]    | 0.003 [0.003,0.003]    | 0.002 [0.002,0.002] |

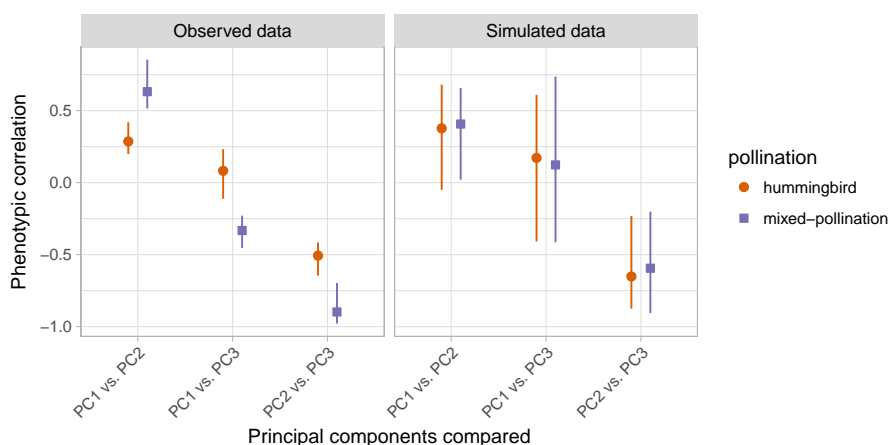

**Figure 4:** Graphical representation of the evolutionary correlations (i.e., standardized evolutionary rates matrices) obtained with the BMVm multivariate model with only species with confirmed pollination strategies, for the observed data (left panel) and for data simulated under the best fitting model (OUM; right panel). Symbols represent the median correlation and the lines the 25% and 75% quantiles for both hummingbirds and mixed-pollination strategies. No artifactual differences are detected between the two groups when fitting models on traits simulated with the OUM model and thus with a common evolutionary covariance (right panel, see text).

## Discussion

Although many aspects of the flower are required for assuring successful reproduction, the  
474 corolla shape is critical for the adaptation of plants to pollinators. In many species, the corolla  
guides the pollinator to allow precise pollen deposition on its body (Muchhala, 2007). But  
pollinators can also show an inherent preference for some floral shapes (Gómez et al., 2008)  
477 and can associate shape and reward when these are correlated (Meléndez-Ackerman et al.,  
1997). Floral shape has in fact repeatedly been shown to be under selection in pollination-  
driven selection studies (Galen, 1989; Campbell et al., 1991; O'Connell and Johnston, 1998;  
480 Maad, 2000) and can be sufficient to impose adaptive trade-off between pollinators (Much-  
hala, 2007). Even the corolla shape of super generalist species has been shown to adapt to  
particular guilds of pollinators (Gómez and Perfectti, 2010; Gómez et al., 2015).

483 In the Antillean genera *Gesneria* and *Rhytidophyllum*, pollination syndromes are well  
characterized and have good predictive value (Martén-Rodríguez et al., 2009), but previous  
studies were based on attractive and mechanical floral characters. Our results based on  
486 geometric morphometrics showed that it is possible to distinguish corollas of hummingbird  
pollinated species from moth pollinated species, and, although to a lesser degree, the corolla  
shapes of species with bat or mixed-pollination strategies. These conclusions were reinforced  
489 by the strong support in favour of distinct shapes for hummingbird specialists and mixed-  
pollination species in evolutionary models, both based on parameter estimates and on support  
for models supporting different evolutionary shape means (BMm models) or distinct shape  
492 optima (OUM models). These results, in addition to the fact that each pollination strategy  
evolved repeatedly in the Gesneriinae, further support the concept of pollination syndromes in  
this group and underlines the importance of corolla shape in floral adaptation to pollinators.

### 495 **Long-term evolutionary constraints on corolla shape**

If several studies estimated selection pressures on flowers within populations, few have ad-  
dressed the question at macroevolutionary scales (but see Gómez et al., 2015). We hypoth-  
498 esized, based on theoretical expectations and empirical results, that the corolla shape of  
flowers should have evolved under evolutionary constraints to maintain effective pollination,



thereby reducing the phenotypic variance among species, and that this variance should be  
501 smaller for more specialist species because they are potentially under a more constant and  
precise selective pressure.

All analyses performed, both univariate and multivariate and using only species with  
504 confirmed pollinator information or also including species with inferred strategies, selected  
OU models that possess a  $\alpha$  parameter that maintains the corolla shape closer to an evolu-  
tionary optimum. This supports the hypothesis that the corolla shape in the group has been  
507 affected by long-term evolutionary constraints, which could be interpreted as a consequence  
of the selective pressure imposed by pollinators. However, the analyses found very small  
phylogenetic halftimes, which are suggestive of very strong selection pressures and/or lack of  
510 phylogenetic correlation in the data (note that a strong impact of selection will necessarily  
reduce the phylogenetic correlation in the data). Considering a potential origin of the group  
ca. 10 mya (Roalson et al., 2008; Roalson and Roberts, 2016) and taking the smallest phy-  
513 logenetic halftime obtained (0.002, for the PC1 in the multivariate analysis; Table 4), this  
means that a corolla shape can move half-way to its optimal shape in  $0.002 \times 10 = 0.02$   
million years, or 20,000 years. This is rapid, but not impossible considering that transitions  
516 between pollination strategies are generally driven by few genes of major effects (Galliot  
et al., 2006; Yuan et al., 2013). These small phylogenetic halftimes can also imply a lack of  
phylogenetic influence, but given that the corolla shape is clearly under genetic control in  
519 the group (Alexandre et al., 2015), this seems less plausible.

Contrarily to our initial hypothesis, we did not find evidence that pollination special-  
ist species show reduced phenotypic disparity compared to mixed-pollination species. The  
522 non-phylogenetic approaches suggested similar amount of variation among species for both  
pollination strategies, and this pattern was confirmed by the evolutionary models. Indeed, al-  
most all analyses selected a model in which both strategies evolved under shared constraints,  
525 but for different means for each selective regime. Moreover, although the differences were  
marginal, the parameter estimates of the evolutionary models that allows the two strategies to  
have different phenotypic disparities almost constantly indicated that it was the hummingbird  
528 specialists that showed a higher disparity compared to the more generalist mixed-pollination  
species.

Morphological integration and evolutionary correlations between shape components al-  
531 lows us to take another view at evolutionary constraints on corolla shape. Indeed, important  
integration between the shape components suggests tight coordination for proper functioning  
and strong evolutionary correlations suggest that components have evolved in an highly coor-  
534 dinated fashion. The results showed both higher morphological integration and evolutionary  
correlations for the mixed-pollination species, which goes against the generally accepted idea  
that more generalist species are less constrained. Overall, we come to the conclusion that  
537 greater generalization in pollination strategies did not imply a relaxation of evolutionary  
constraints over macroevolutionary scales in Antillean Gesneriinae.

How can we explain that we did not observe more phenotypic disparity for the mixed-  
540 pollination strategy? Although any answer to this question is necessarily tentative at this  
point, a potential line of enquiry could be associated with the process by which the species  
become generalized. One such process, which we call the compromised phenotype and that  
543 motivated our initial hypotheses, is that generalists evolve by becoming intermediate in  
morphology relative to specialist species (Fig. 5). This could occur in the presence of weak  
or non-symmetric trade-off effects if both pollinators are present (Aigner, 2001, 2006; Sahli  
546 and Conner, 2011). Under such a scenario, the floral variation of generalists could span the  
whole region between the shapes of the two specialists either because of drift or because of  
variation in the the relative contribution of the different pollinators for each species. This  
549 could result in a relatively broad variation among species compared to that of specialists;  
but this is not what we observe here.

An alternative, called the specialized phenotype, is that the generalists occupy a distinct  
552 region in the phenotypic landscape (Fig. 5). Under this scenario, the morphological variance  
in floral shape need not be greater than that of specialists as generalists could have a floral  
morphology optimized to both types of pollinators. This model may fit well to the present  
555 group as it has been suggested that the presence of a constriction at the base of the corolla  
for species with a mixed-pollination strategy could represent an adaptation to allow a good  
pollination service by both hummingbirds and bats by forcing them to approach the flower in  
558 a specific way (Martén-Rodríguez et al., 2009). The fact that the corolla shape typical of this  
pollination strategy has evolved recurrently in the group (Fig. 2) certainly adds weight to

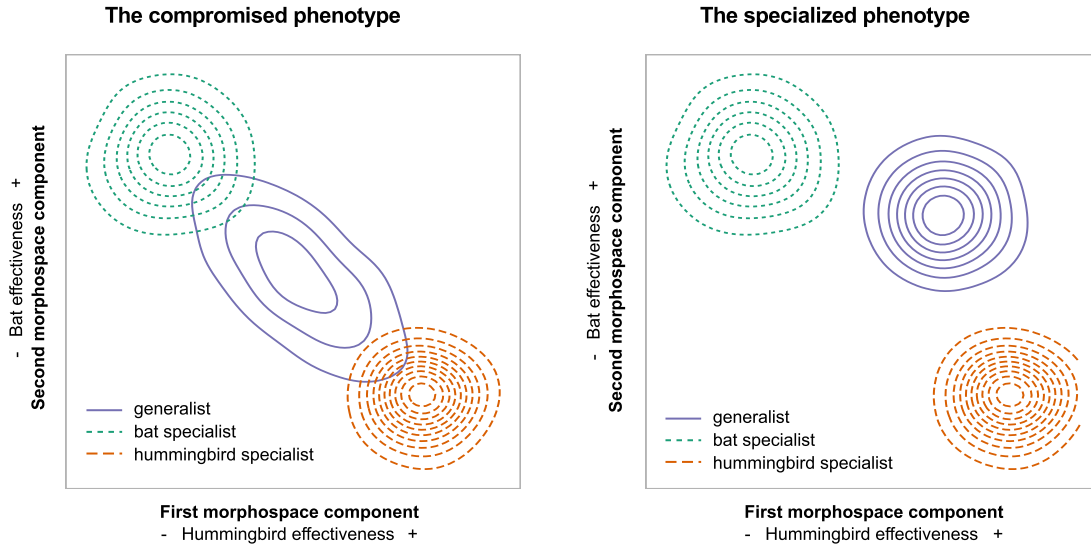

**Figure 5:** Conceptual phenotypic landscapes illustrating the distribution in mean phenotype of ecological specialist and generalist species associated with two scenarios of evolution of generalization. The x- and y-axis are associated with increases in hummingbird and bat pollination effectiveness, respectively. This is clearly an oversimplified example as real morphospaces are multi-dimensional and the relationship between pollination effectiveness and morphology more complex. In the **compromised phenotype** scenario, the generalists are intermediate in morphology between the two specialists and have the potential to occupy the full extent of variation between the two extremes. In such a scenario, the generalists can have greater variance in morphology and pollination effectiveness than specialists. In the **specialized phenotype** scenario, the generalists occupy a completely distinct region of the morphological landscape; they do not (necessarily) show increased morphological variance compared to specialists and shows good pollination effectiveness by both types of pollinators.

this hypothesis. These mixed-pollination species might thus have a phenotypically specialized  
561 corolla, in the sense that it is well adapted to both bat and hummingbird pollination, even  
though they are ecological generalists by being pollinated by different functional pollinators.  
Indeed, concepts of phenotypic specialization and ecological specialization need not be corre-  
564 lated (Ollerton et al., 2007; Fleming and Muchhala, 2008; Armbruster, 2014). This strategy  
might be particularly successful in fine-grained pollination environment (Aigner, 2006), such  
as where pollinators are scarce or vary through time (Waser et al., 1996). Such hypothesis of  
567 adaptive generalization (see Gómez and Zamora, 2006) certainly deserves more attention in  
the future, and will require information on pollination frequency and efficiency to properly  
associate flower shape to the relative efficiency of pollinators.

570 The detection of selection constraints for both pollination strategies is noteworthy given  
that several factors probably contribute in reducing this signal over macroevolutionary timescales.

For instance, temporal variation in pollination guilds over macroevolutionary times could  
573 weaken the signal of selection, mirroring observations at the population level (e.g., Camp-  
bell, 1989; Campbell et al., 1991). The pollination guilds were assumed to be functionally  
constant over time in our analyses. But given that the exact species pollinating the flowers  
576 vary among plant species (Martén-Rodríguez et al., 2009, 2015), the whole story might be  
more complex. For instance, unrecognized sub-syndromes could be responsible for the larger  
variation observed for the hummingbird strategy and additional pollinator information will  
579 be needed to investigate this further. Variation in selective pressure among species could also  
occur if agents other than pollinators affect corolla shape. For instance, the apical constrict-  
tion of the corolla of hummingbird pollinated *Drymonia* (Gesneriaceae) has recently been  
582 suggested to be an adaptation to exclude bees (Clark et al., 2015). Moreover, herbivores,  
including nectar robbers, may affect the selective forces imposed on flowers by pollinators  
(e.g., Galen and Cuba, 2001; Gómez, 2003). While non-pollinating floral visitors—including  
585 bees—are generally not abundant in the group (Martén-Rodríguez et al., 2009, 2015) and  
herbivory is not common (pers. obs.), it is difficult to completely discard this possibility.

This study is one of the first to show evidence of constrained evolution on flower shapes  
588 imposed by pollinator guilds over macroevolutionary time scales and demonstrates the use-  
fulness of a phylogenetic approach to understand pollinator mediated selection. Although ad-  
ditional investigations are needed to confirm these patterns, this study certainly adds weight  
591 to the evidence accumulated by many others over the years that the specialist - generalist  
continuum in pollination biology is complex (Waser et al., 1996; Waser and Ollerton, 2006)  
and that we cannot assume a priori that pollination specialists show reduced phenotypic  
594 disparity compared to pollination generalists.

## Supplementary figures and tables

The supplementary figures and table are available with the supplementary material that is  
597 associated with this manuscript. The interactive supplementary figures can be visualized  
here: [www.plantevolution.org/data/Joly\\_2017\\_SuppFigs.html](http://www.plantevolution.org/data/Joly_2017_SuppFigs.html).

## Authors contributions

600 SJ conceived the study. FL, HA, ELB and JLC collected the data, SJ, FL and JC analyzed the data, SJ wrote the draft and all authors contributed and critically edited the final manuscript.

## Acknowledgements

603 We thank William Cinea and Phito Merizier that significantly contributed to making this work possible, Julie Faure for constructive discussions, and Cécile Ané for comments and suggestions on a previous manuscript. We also acknowledge the help of Calcul Québec and  
606 the Genome Québec Innovation Centre.

## Funding

Funding to JLC was provided by a Research and Exploration grant from the National Ge-  
609 ographic Society (9522-14). This study was financially supported by the Quebec Centre for Biodiversity Science (QCBS) and by a Discovery Grant to SJ from the Natural Sciences and Engineering Research Council of Canada (402363-2011).

## References

- 612 Adams, D. C. and E. Otárola-Castillo, 2013. geomorph: an R package for the collection and analysis of geometric morphometric shape data. *Methods Ecol Evol* 4:393–399.
- 615 Aigner, P. A., 2001. Optimality modeling and fitness trade-offs: when should plants become pollinator specialists? *Oikos* 95:177–184.
- , 2006. The evolution of specialized floral phenotypes in a fine-grained pollination environment. Pp. 23–  
618 46, in N. M. Waser and J. Ollerton, eds. *Plant-pollinator interactions: from specialization to generalization*. University of Chicago Press, Chicago.
- Alexandre, H., J. Vrignaud, B. Mangin, and S. Joly, 2015. Genetic architecture of pollination syndrome tran-  
621 sition between hummingbird-specialist and generalist species in the genus *Rhytidophyllum* (Gesneriaceae). *PeerJ* 3:e1028.
- Armbruster, W. S., 2014. Floral specialization and angiosperm diversity: phenotypic divergence, fitness  
624 trade-offs and realized pollination accuracy. *AoB PLANTS* 6:plu003.

- Ashman, T.-L. and C. J. Majetic, 2006. Genetic constraints on floral evolution: a review and evaluation of patterns. *Heredity* 96:343–352.
- 627 Baker, H. G., 1961. The adaptation of flowering plants to nocturnal and crepuscular pollinators. *The Quarterly Review of Biology* 36:64–73.
- Beaulieu, J. M., D.-C. Jhwueng, C. Boettiger, and B. C. O’Meara, 2012. Modeling stabilizing selection: expanding the Ornstein-Uhlenbeck model of adaptive evolution. *Evolution* 66:2369–2383.
- 630 Boberg, E., R. Alexandersson, M. Jonsson, J. Maad, J. Ågren, and L. A. Nilsson, 2014. Pollinator shifts and the evolution of spur length in the moth-pollinated orchid *Platanthera bifolia*. *Ann Bot* 113:267–275.
- 633 Bookstein, F. L., 1997. Landmark methods for forms without landmarks: morphometrics of group differences in outline shape. *Medical Image Analysis* 1:225–243.
- Boucher, F. C. and V. Démary, 2016. Inferring bounded evolution in phenotypic characters from phylogenetic comparative data. *Syst Biol* 65:651–661.
- 636 Breitkopf, H., R. E. Onstein, D. Cafasso, P. M. Schlüter, and S. Cozzolino, 2015. Multiple shifts to different pollinators fuelled rapid diversification in sexually deceptive *Ophrys* orchids. *New Phytol* 207:377–389.
- 639 Burnham, K. P. and D. R. Anderson, 2002. *Model selection and multimodel inference: a practical information-theoretic approach*. 2nd edition ed. Springer, New York.
- Butler, M. and A. King, 2004. *Phylogenetic comparative analysis: a modeling approach for adaptive evolution*. *The American Naturalist* 164:683–695.
- 642 Campbell, D. R., 1989. Measurements of selection in a hermaphroditic plant: variation in male and female pollination success. *Evolution* 43:318–334.
- 645 Campbell, D. R., N. M. Waser, M. V. Price, E. A. Lynch, and R. J. Mitchell, 1991. Components of phenotypic selection: pollen export and flower corolla width in *Ipomopsis aggregata*. *Evolution* 45:1458–1467.
- Castresana, J., 2000. Selection of conserved blocks from multiple alignments for their use in phylogenetic analysis. *Molecular Biology and Evolution* 17:540–552.
- 648 Clark, J. L., L. Clavijo, and N. Muchhala, 2015. Convergence of anti-bee pollination mechanisms in the Neotropical plant genus *Drymonia* (Gesneriaceae). *Evol Ecol* 29:355–377.
- 651 Clavel, J., G. Escarguel, and G. Merceron, 2015. mvMORPH: an R package for fitting multivariate evolutionary models to morphometric data. *Methods Ecol Evol* 6:1311–1319.

- Conner, J. K., A. M. Rice, C. Stewart, and M. T. Morgan, 2003. Patterns and mechanisms of selection on a  
654 family-diagnostic trait: evidence from experimental manipulation and lifetime fitness selection gradients.  
Evolution 57:480–486.
- Cooper, N., G. H. Thomas, C. Venditti, A. Meade, and R. P. Freckleton, 2016. A cautionary note on the use  
657 of Ornstein Uhlenbeck models in macroevolutionary studies. Biol. J. Linn. Soc. 118:64–77.
- Crepet, W. L., 1984. Advanced (constant) insect pollination mechanisms: pattern of evolution and implica-  
tions vis-a-vis angiosperm diversity. Annals of the Missouri Botanical Garden 71:607–630.
- 660 Cresswell, J. E., 1998. Stabilizing selection and the structural variability of flowers within species. Ann Bot  
81:463–473.
- Darriba, D., G. L. Taboada, R. Doallo, and D. Posada, 2012. jModelTest 2: more models, new heuristics  
663 and parallel computing. Nature Methods 9:772–772.
- Drummond, A. J., M. A. Suchard, D. Xie, and A. Rambaut, 2012. Bayesian phylogenetics with BEAUti and  
the BEAST 1.7. Mol Biol Evol .
- 666 Faegri, K. and L. van der Pijl, 1979. The Principles of Pollination Ecology. Pergamon Press, Oxford, UK.
- Felsenstein, J., 1985. Phylogenies and the comparative method. The American Naturalist 125:1–15.
- , 1988. Phylogenies and quantitative characters. Ann. Rev. Ecol. Syst. 19:445–471.
- 669 Fenster, C. B., W. S. Armbruster, P. Wilson, M. R. Dudash, and J. D. Thomson, 2004. Pollination syndromes  
and floral specialization. Annu. Rev. Ecol. Evol. Syst. 35:375–403.
- Fleming, T. H. and N. Muchhala, 2008. Nectar-feeding bird and bat niches in two worlds: pantropical  
672 comparisons of vertebrate pollination systems. Journal of Biogeography 35:764–780.
- Flemming, T. H., N. Muchhala, and J. F. Ornelas, 2005. New world nectar-feeding vertebrates: commu-  
nity patterns and processes. Pp. 163–186, in V. Sánchez-Cordero and R. Medellín, eds. Contribuciones  
675 mastozoológicas en homenaje a Bernardo Villa. UNAM, México.
- Forest, F., P. Goldblatt, J. C. Manning, D. Baker, J. F. Colville, D. S. Devey, S. Jose, M. Kaye, and S. Buerki,  
2014. Pollinator shifts as triggers of speciation in painted petal irises (*Lapeirousia*: Iridaceae). Ann Bot  
678 113:357–371.
- Galen, C., 1989. Measuring pollinator-mediated selection on morphometric floral traits: bumblebees and the  
alpine sky pilot, *Polemonium viscosum*. Evolution 43:882–890.

- 681 Galen, C. and J. Cuba, 2001. Down the tube: pollinators, predators, and the evolution of flower shape in  
the alpine skypilot, *Polemonium viscosum*. *Evolution* 55:1963–1971.
- Galliot, C., J. Stuurman, and C. Kuhlemeier, 2006. The genetic dissection of floral pollination syndromes.  
684 *Curr. Opin. Plant Biol.* 9:78–82.
- Gascuel, O. and M. Steel, 2014. Predicting the ancestral character changes in a tree is typically easier than  
predicting the root state. *Syst Biol* 63:421–435.
- 687 Gómez, J., 2003. Herbivory reduces the strength of pollinator-mediated selection in the Mediterranean herb  
*Erysimum mediohispanicum*: consequences for plant specialization. *The American Naturalist* 162:242–256.
- Gómez, J. M., J. Bosch, F. Perfectti, J. D. Fernández, M. Abdelaziz, and J. P. M. Camacho, 2008. Spatial  
690 variation in selection on corolla shape in a generalist plant is promoted by the preference patterns of its  
local pollinators. *Proc. R. Soc. B* 275:2241–2249.
- Gómez, J. M. and F. Perfectti, 2010. Evolution of complex traits: the case of *Erysimum* corolla shape.  
693 *International Journal of Plant Sciences* 171:987–998.
- Gómez, J. M., F. Perfectti, and J. Lorite, 2015. The role of pollinators in floral diversification in a clade of  
generalist flowers. *Evolution* 69:863–878.
- 696 Gómez, J. M. and R. Zamora, 2006. Ecological factors that promote the evolution of generalization in  
pollination systems. Pp. 145–165, *in* Plant-pollinator interactions, from specialization to generalization.  
University of Chicago Press.
- 699 Haller, B. C. and A. P. Hendry, 2014. Solving the paradox of stasis: squashed stabilizing selection and the  
limits of detection. *Evolution* 68:483–500.
- Hansen, T. F., 1997. Stabilizing selection and the comparative analysis of adaptation. *Evolution* 51:1341–  
702 1351.
- Hansen, T. F. and E. P. Martins, 1996. Translating between microevolutionary process and macroevolutionary  
patterns: the correlation structure of interspecific data. *Evolution* 50:1404–1417.
- 705 Harmon, L. J., J. T. Weir, C. D. Brock, R. E. Glor, and W. Challenger, 2008. GEIGER: investigating  
evolutionary radiations. *Bioinformatics* 24:129–131.
- Herrera, C. M., 1988. Variation in mutualisms: the spatiotemporal mosaic of a pollinator assemblage.  
708 *Biological Journal of the Linnean Society* 35:95–125.
- Huelsenbeck, J. P., R. Nielsen, and J. P. Bollback, 2003. Stochastic mapping of morphological characters.  
*Syst Biol* 52:131–158.



- 711 Johnson, S. D., 2010. The pollination niche and its role in the diversification and maintenance of the southern African flora. *Philos Trans R Soc Lond B Biol Sci* 365:499–516.
- Johnson, S. D. and K. E. Steiner, 2000. Generalization versus specialization in plant pollination systems. 714 *Trends in Ecology & Evolution* 15:140–143.
- Katoh, K. and D. M. Standley, 2013. MAFFT multiple sequence alignment software version 7: improvements in performance and usability. *Mol Biol Evol* 30:772–780.
- 717 Klingenberg, C. P., 2013. Cranial integration and modularity: insights into evolution and development from morphometric data. *Hystrix* 24:43–58.
- Lande, R., 1976. Natural selection and random genetic drift in phenotypic evolution. *Evolution* 30:314–334.
- 720 ———, 1979. Quantitative genetic analysis of multivariate evolution, applied to brain: body size allometry. *Evolution* 33:402–416.
- Maad, J., 2000. Phenotypic selection in hawkmoth-pollinated *Platanthera bifolia*: targets and fitness surfaces. 723 *Evolution* 54:112–123.
- Martén-Rodríguez, S., A. Almarales-Castro, and C. B. Fenster, 2009. Evaluation of pollination syndromes in Antillean Gesneriaceae: evidence for bat, hummingbird and generalized flowers. *Journal of Ecology* 726 97:348–359.
- Martén-Rodríguez, S. and C. B. Fenster, 2008. Pollination ecology and breeding systems of five *Gesneria* species from Puerto Rico. *Ann Bot* 102:23–30.
- 729 Martén-Rodríguez, S., C. B. Fenster, I. Agnarsson, L. E. Skog, and E. A. Zimmer, 2010. Evolutionary breakdown of pollination specialization in a caribbean plant radiation. *New Phytologist* 188:403–417.
- Martén-Rodríguez, S., W. J. Kress, E. J. Temeles, and E. Meléndez-Ackerman, 2011. Plant-pollinator interactions and floral convergence in two species of *Heliconia* from the Caribbean Islands. *Oecologia* 732 167:1075–1083.
- Martén-Rodríguez, S., M. Quesada, A.-A. Castro, M. Lopezaraiza-Mikel, and C. B. Fenster, 2015. A comparison of reproductive strategies between island and mainland Caribbean Gesneriaceae. *J Ecol* 103:1190–1204. 735
- Medan, D., A. M. Basilio, M. Devoto, N. J. Bartoloni, J. P. Torretta, and T. Petanidou, 2006. Measuring generalization and connectance in temperate, year-long active systems. Pp. 245–259, *in* Plant-pollinator interactions: from specialization to generalization. The University of Chicago Press, Chicago.
- Meléndez-Ackerman, E., D. R. Campbell, and N. M. Waser, 1997. Hummingbird behavior and mechanisms of selection on flower color in *Ipomopsis*. *Ecology* 78:2532–2541.

- 741 Muchhala, N., 2006. The pollination biology of *Burmeistera* (Campanulaceae): specialization and syndromes.  
Am. J. Bot. 93:1081–1089.
- , 2007. Adaptive trade-off in floral morphology mediates specialization for flowers pollinated by bats  
744 and hummingbirds. Am. Nat. 169:494–504.
- Newman, E., B. Anderson, and S. D. Johnson, 2012. Flower colour adaptation in a mimetic orchid. Proc.  
R. Soc. B 279:2309–2313.
- 747 Newman, E., J. Manning, and B. Anderson, 2014. Matching floral and pollinator traits through guild  
convergence and pollinator ecotype formation. Ann Bot 113:373–384.
- van der Niet, T. and S. D. Johnson, 2012. Phylogenetic evidence for pollinator-driven diversification of  
750 angiosperms. Trends in Ecology & Evolution 27:353–361.
- Niet, T. V. d., M. D. Pirie, A. Shuttleworth, S. D. Johnson, and J. J. Midgley, 2014. Do pollinator distributions  
underlie the evolution of pollination ecotypes in the Cape shrub *Erica plukenetii*? Ann Bot 113:301–316.
- 753 O’Connell, L. M. and M. O. Johnston, 1998. Male and female pollination success in a deceptive orchid, a  
selection study. Ecology 79:1246–1260.
- Oksanen, J., F. G. Blanchet, M. Friendly, R. Kindt, P. Legendre, D. McGlinn, P. R. Minchin, R. B. O’Hara,  
756 G. L. Simpson, P. Solymos, M. H. H. Stevens, E. Szoecs, and H. Wagner, 2017. vegan: Community Ecology  
Package. URL <http://CRAN.R-project.org/package=vegan>. R package version 2.4-2.
- Ollerton, J., A. Killick, E. Lamborn, S. Watts, and M. Whiston, 2007. Multiple meanings and modes: on  
759 the many ways to be a generalist flower. Taxon 56:717–728.
- O’Meara, B. C., C. Ané, M. J. Sanderson, and P. C. Wainwright, 2006. Testing for different rates of continuous  
trait evolution using likelihood. Evol 60:922.
- 762 Pavlicev, M., J. M. Cheverud, and G. P. Wagner, 2009. Measuring morphological integration using eigenvalue  
variance. Evol Biol 36:157–170.
- Perret, M., A. Chautems, R. Spichiger, T. G. Barraclough, and V. Savolainen, 2007. The geographical pattern  
765 of speciation and floral diversification in the Neotropics: the tribe Sinningieae (Gesneriaceae) as a case  
study. Evolution 61:1641–1660.
- Price, S. A., J. J. Tavera, T. J. Near, and P. C. Wainwright, 2013. Elevated rates of morphological and  
768 functional diversification in reef-dwelling Haemulid fishes. Evolution 67:417–428.
- R core team, 2014. R: a language and environment for statistical computing. URL <http://www.R-project.org>.

- 771 Revell, L. J., 2012. phytools: an R package for phylogenetic comparative biology (and other things). *Methods in Ecology and Evolution* 3:217–223.
- , 2013. A comment on the use of stochastic character maps to estimate evolutionary rate variation in  
774 a continuously valued trait. *Syst. Biol.* 62:339–345.
- Revell, L. J. and D. C. Collar, 2009. Phylogenetic analysis of the evolutionary correlation using likelihood. *Evolution* 63:1090–1100.
- 777 Roalson, E. H. and W. R. Roberts, 2016. Distinct processes drive diversification in different clades of Gesneriaceae. *Syst Biol* 65:662–684.
- Roalson, E. H., L. E. Skog, and E. A. Zimmer, 2008. Untangling Gloxinieae (Gesneriaceae). II. Reconstructing  
780 biogeographic patterns and estimating divergence times among New World continental and island lineages. *Systematic Botany* 33:159–175.
- Rohlf, F. J., 2010. TPSDig2, version 2.16. URL <http://life.bio.sunysb.edu/morph/soft-dataacq.html>.
- 783 Sahli, H. F. and J. K. Conner, 2011. Testing for conflicting and nonadditive selection: floral adaptation to multiple pollinators through male and female fitness. *Evolution* 65:1457–1473.
- Silvestro, D., A. Kostikova, G. Litsios, P. B. Pearman, and N. Salamin, 2015. Measurement errors should  
786 always be incorporated in phylogenetic comparative analysis. *Methods Ecol Evol* 9:340–346.
- Skog, L. E., 2012. Gesneriaceae. Pp. 350–364, in P. Acevedo-Rodríguez and M. T. Strong, eds. *Catalogue of seed plants of the west indies*, *Smithsonian contributions to botany*, vol. 98. Smithsonian Institution  
789 Scholarly Press, Washington D.C.
- Slater, G. J., 2013. Phylogenetic evidence for a shift in the mode of mammalian body size evolution at the Cretaceous-Palaeogene boundary. *Methods Ecol Evol* 4:734–744. URL <http://onlinelibrary.wiley.com/doi/10.1111/2041-210X.12084/abstract>.  
792
- Smith, S. D., 2010. Using phylogenetics to detect pollinator-mediated floral evolution. *New Phytologist* 188:354–363.
- 795 Stanton, M. L., A. A. Snow, and S. N. Handel, 1986. Floral evolution: attractiveness to pollinators increases male fitness. *Science(Washington)* 232:1625–1627.
- Stebbins, G. L., 1970. Adaptive radiation of reproductive characteristics in angiosperms, I: Pollination  
798 mechanisms. *Annual Review of Ecology and Systematics* 1:307–326.
- Sun, M., K. Gross, and F. P. Schiestl, 2014. Floral adaptation to local pollinator guilds in a terrestrial orchid. *Ann Bot* 113:289–300.

- 801 Thomas, G. H., R. P. Freckleton, and T. Székely, 2006. Comparative analyses of the influence of developmental mode on phenotypic diversification rates in shorebirds. *Proceedings of the Royal Society of London B: Biological Sciences* 273:1619–1624.
- 804 Thomas, G. H., S. Meiri, and A. B. Phillimore, 2009. Body size diversification in *Anolis*: novel environment and island effects. *Evolution* 63:2017–2030.
- Uyeda, J. C., D. S. Caetano, and M. W. Pennell, 2015. Comparative analysis of principal components can  
807 be misleading. *Syst Biol* 64:677–689.
- Valente, L. M., J. C. Manning, P. Goldblatt, P. Vargas, A. E. T.-L. R. Ashman, and E. M. A. McPeck, 2012. Did pollination shifts drive diversification in southern African *Gladiolus*? Evaluating the model of  
810 pollinator-driven speciation. *The American Naturalist* 180:83–98.
- Waser, N. M., 1998. Pollination, angiosperm speciation, and the nature of species boundaries. *Oikos* 82:198–201.
- 813 Waser, N. M., L. Chittka, M. V. Price, N. M. Williams, and J. Ollerton, 1996. Generalization in pollination systems, and why it matters. *Ecology* 77:1043–1060.
- Waser, N. M. and J. Ollerton, 2006. *Plant-pollinator interactions: from specialization to generalization*.  
816 University of Chicago Press.
- Waser, N. M. and M. V. Price, 1981. Pollinator choice and stabilizing selection for flower color in *Delphinium nelsonii*. *Evolution* 35:376–390.
- 819 Whittall, J. B. and S. A. Hodges, 2007. Pollinator shifts drive increasingly long nectar spurs in columbine flowers. *Nature* 447:706–709.
- Young, N. M., 2006. Function, ontogeny and canalization of shape variance in the primate scapula. *Journal of Anatomy* 209:623–636.  
822
- Yuan, Y.-W., K. J. Byers, and H. Bradshaw Jr., 2013. The genetic control of flower-pollinator specificity. *Current Opinion in Plant Biology* 16:422–428.

**Table S1:** Pollinator information for the species included in the study.

| Species                                                    | Pollinator        | Confirmed | Reference                    |
|------------------------------------------------------------|-------------------|-----------|------------------------------|
| <i>Gesneria acaulis</i>                                    | hummingbird       | yes       | Marten-Rodriguez et al. 2009 |
| <i>Gesneria viridiflora</i> subsp. <i>acrochordonanthe</i> | unknown           | no        |                              |
| <i>Gesneria aspera</i>                                     | hummingbird       | yes       | Marten-Rodriguez et al. 2009 |
| <i>Gesneria bracteosa</i>                                  | unknown           | no        |                              |
| <i>Gesneria citrina</i>                                    | hummingbird       | yes       | Marten-Rodriguez et al. 2008 |
| <i>Gesneria clarensis</i>                                  | unknown           | no        |                              |
| <i>Gesneria cubensis</i>                                   | hummingbird       | yes       | Marten-Rodriguez et al. 2010 |
| <i>Gesneria cuneifolia</i>                                 | hummingbird       | yes       | Marten-Rodriguez et al. 2008 |
| <i>Gesneria duchartreoides</i>                             | unknown           | no        |                              |
| <i>Gesneria ekmanii</i>                                    | unknown           | no        |                              |
| <i>Gesneria ferruginae</i>                                 | hummingbird       | no        |                              |
| <i>Gesneria fruticosa</i>                                  | bat               | yes       | Marten-Rodriguez et al. 2009 |
| <i>Gesneria glandulosa</i>                                 | hummingbird       | no        |                              |
| <i>Gesneria harrisii</i>                                   | hummingbird       | no        |                              |
| <i>Gesneria humilis</i>                                    | moth              | yes       | Marten-Rodriguez et al. 2015 |
| <i>Gesneria lopezii</i>                                    | hummingbird       | no        |                              |
| <i>Gesneria neglecta</i>                                   | bat               | no        |                              |
| <i>Gesneria nipensis</i>                                   | hummingbird       | no        |                              |
| <i>Gesneria pauciflora</i>                                 | hummingbird       | no        |                              |
| <i>Gesneria pedicellaris</i>                               | hummingbird       | yes       | Marten-Rodriguez et al. 2009 |
| <i>Gesneria pedunculosa</i>                                | bat               | yes       | Marten-Rodriguez et al. 2008 |
| <i>Gesneria pulverulenta</i>                               | hummingbird       | yes       | Marten-Rodriguez et al. 2009 |
| <i>Gesneria purpurascens</i>                               | hummingbird       | yes       | Marten-Rodriguez et al. 2015 |
| <i>Gesneria quisqueyana</i>                                | bat               | yes       | Marten-Rodriguez et al. 2009 |
| <i>Gesneria reticulata</i>                                 | hummingbird       | yes       | Marten-Rodriguez et al. 2015 |
| <i>Gesneria salicifolia</i>                                | hummingbird       | no        |                              |
| <i>Gesneria scabra</i>                                     | hummingbird       | no        |                              |
| <i>Gesneria depressa</i>                                   | unknown           | no        |                              |
| <i>Gesneria sintenisii</i>                                 | mixed-pollination | yes       | Marten-Rodriguez et al. 2008 |
| <i>Gesneria</i> sp                                         | unknown           | no        |                              |
| <i>Gesneria ventricosa</i>                                 | hummingbird       | yes       | Marten-Rodriguez et al. 2009 |
| <i>Gesneria viridiflora</i> subsp. <i>viridiflora</i>      | mixed-pollination | yes       | Marten-Rodriguez et al. 2015 |
| <i>Gesneria yamuriensis</i>                                | hummingbird       | no        |                              |
| <i>Rhytidophyllum auriculatum</i>                          | mixed-pollination | yes       | Marten-Rodriguez et al. 2009 |
| <i>Rhytidophyllum berterioanum</i>                         | hummingbird       | yes       | Marten-Rodriguez et al. 2009 |
| <i>Rhytidophyllum bicolor</i>                              | unknown           | no        |                              |
| <i>Rhytidophyllum bullatum</i>                             | hummingbird       | no        |                              |
| <i>Rhytidophyllum crenulatum</i>                           | mixed-pollination | yes       | Marten-Rodriguez et al. 2010 |
| <i>Rhytidophyllum earlei</i>                               | hummingbird       | no        |                              |
| <i>Rhytidophyllum exsertum</i>                             | mixed-pollination | yes       | Marten-Rodriguez et al. 2010 |
| <i>Rhytidophyllum grandiflorum</i>                         | mixed-pollination | yes       | Marten-Rodriguez et al. 2009 |
| <i>Rhytidophyllum intermedium</i>                          | unknown           | no        |                              |
| <i>Rhytidophyllum leucomallon</i>                          | mixed-pollination | yes       | Marten-Rodriguez et al. 2009 |
| <i>Rhytidophyllum lomensis</i>                             | hummingbird       | no        |                              |
| <i>Rhytidophyllum minus</i>                                | mixed-pollination | yes       | Marten-Rodriguez et al. 2015 |
| <i>Rhytidophyllum rupicola</i>                             | hummingbird       | yes       | Marten-Rodriguez et al. 2010 |
| <i>Rhytidophyllum</i> sp                                   | unknown           | no        |                              |
| <i>Rhytidophyllum tomentosum</i>                           | mixed-pollination | yes       | Marten-Rodriguez et al. 2010 |
| <i>Rhytidophyllum vernicosum</i>                           | mixed-pollination | yes       | Marten-Rodriguez et al. 2009 |
| <i>Bellonia spinosa</i>                                    | bee               | yes       | Marten-Rodriguez et al. 2008 |

**Table S2:** Information on the flower pictures included in the study.

| FileName                                                  | CodeSpecies        | Voucher    |
|-----------------------------------------------------------|--------------------|------------|
| GES_acaulis_APR72R1.13.jpg                                | GES_acaulis        | no_voucher |
| GES_acaulis_G877_G940_G1238.1.jpg                         | GES_acaulis        | LHBH G877  |
| GES_acaulis_JLC_11303_02.jpg                              | GES_acaulis        | JLC 11303  |
| GES_bracteosa_JLC_10567_53.jpg                            | GES_bracteosa      | JLC 10567  |
| GES_citrina_G888_Dec.1965.1.jpg                           | GES_citrina        | LHBH G888  |
| GES_citrina_JLC_10021_07.jpg                              | GES_citrina        | JLC 10021  |
| GES_clarensis_JLC_10488_117.jpg                           | GES_clarensis      | JLC 10488  |
| GES_cuneifolia_APR_72R9.1.jpg                             | GES_cuneifolia     | no_voucher |
| GES_cuneifolia_Dunn.1.jpg                                 | GES_cuneifolia     | no_voucher |
| GES_cuneifolia_G763_BH_1973.1.jpg                         | GES_cuneifolia     | LHBH G763  |
| GES_cuneifolia_G784_G857.1.jpg                            | GES_cuneifolia     | LHBH       |
| GES_cuneifolia_G857_Puerto_Rico_Tapley_1965.2.jpg         | GES_cuneifolia     | LHBH G857  |
| GES_cuneifolia_G869_G857_G763.1.jpg                       | GES_cuneifolia     | LHBH       |
| GES_cuneifolia_G869_Puerto_Rico_1963_Tapley_10_5_BH_4.jpg | GES_cuneifolia     | LHBH G869  |
| GES_cuneifolia_july_1980.1.jpg                            | GES_cuneifolia     | no_voucher |
| GES_duchartreoides_JLC_12791_067.jpg                      | GES_duchartreoides | JLC 12791  |
| GES_ferruginae_JLC_10627_083.jpg                          | GES_ferruginae     | JLC 10627  |
| GES_fruticosa_Cornell_G1035_01.jpg                        | GES_fruticosa      | LHBH G1035 |
| GES_fruticosa_Skog_01.jpg                                 | GES_fruticosa      | no_voucher |
| GES_glandulosa_JLC_12772_023.jpg                          | GES_glandulosa     | JLC 12772  |
| GES_harrisii_Jamaica_Guaco_Rock_3.jpg                     | GES_harrisii       | no_voucher |
| GES_harrisii_Tapley_1964.jpg                              | GES_harrisii       | no_voucher |
| GES_heterochroa_JLC_12800_061.jpg                         | GES_heterochroa    | JLC 12800  |
| GES_humilis_G1365_M.Stone.2.jpg                           | GES_humilis        | LHBH G1365 |
| GES_humilis_JLC_10040_06.jpg                              | GES_humilis        | JLC 10040  |
| GES_humilis_JLC_10472_11.jpg                              | GES_humilis        | JLC 10472  |
| GES_humilis_JLC_10574_14.jpg                              | GES_humilis        | JLC 10574  |
| GES_humilis_JLC_10584_01.jpg                              | GES_humilis        | JLC 10584  |
| GES_humilis_JLC_10589_25.jpg                              | GES_humilis        | JLC 10589  |
| GES_humilis_JLC_10624_04.jpg                              | GES_humilis        | JLC 10624  |
| GES_humilis_JLC_10630_05.jpg                              | GES_humilis        | JLC 10630  |
| GES_humilis_JLC_10633_13.jpg                              | GES_humilis        | JLC 10633  |
| GES_humilis_JLC_10634_10.jpg                              | GES_humilis        | JLC 10634  |
| GES_lopezii_Suarez_Cuba_Mayari_25.jpg                     | GES_lopezii        | no_voucher |
| GES_neglecta_Cornell_G875_01.jpg                          | GES_neglecta       | LHBH G875  |
| GES_nipensis_JLC_10577_30.jpg                             | GES_nipensis       | JLC 10577  |
| GES_nipensis_JLC_10578_05.jpg                             | GES_nipensis       | JLC 10578  |
| GES_pauciflora_G769.1.jpg                                 | GES_pauciflora     | LHBH G769  |
| GES_pauciflora_Gesneria_lemondrop_3.jpg                   | GES_pauciflora     | no_voucher |
| GES_pedicellaris_domrep_talpey_1.jpg                      | GES_pedicellaris   | no_voucher |
| GES_pedicellaris_G898_G883_G1231.1.jpg                    | GES_pedicellaris   | LHBH       |
| GES_pedicellaris_JLC_10635_04.jpg                         | GES_pedicellaris   | JLC 10635  |
| GES_pedicellaris_JLC_11328_13.jpg                         | GES_pedicellaris   | JLC 11328  |
| GES_pedicellaris_pauciflora_sacatilis.1.jpg               | GES_pedicellaris   | no_voucher |
| GES_pedunculosa_USBRG_1997_204.1.jpg                      | GES_pedunculosa    | USBRG      |
| GES_pedunculosa_USBRG_96_342.1.jpg                        | GES_pedunculosa    | USBRG      |
| GES_pulverulenta_G1034.1.jpg                              | GES_pulverulenta   | LHBH G1034 |
| GES_purpurascens_JLC_10564_124.jpg                        | GES_purpurascens   | JLC 10564  |
| GES_purpurascens_JLC_12769_096.jpg                        | GES_purpurascens   | JLC 12769  |
| GES_quisqueyana_APR_72R9_11.jpg                           | GES_quisqueyana    | no_voucher |
| GES_reticulata_dominicanrepublic_talpey_1972.1.jpg        | GES_reticulata     | no_voucher |
| GES_reticulata_G784.3.jpg                                 | GES_reticulata     | LHBH G784  |
| GES_reticulata_USBRG_1997_205.2.jpg                       | GES_reticulata     | USBRG      |
| GES_salicifolia_JLC_10566_79.jpg                          | GES_salicifolia    | JLC 10566  |
| GES_scabra_sphaerocarpa_G881.1.jpg                        | GES_scabra         | LHBH G881  |
| GES_scabra_sphaerocarpa_jamaica_talpey_1964.1.jpg         | GES_scabra         | no_voucher |
| GES_shaferi_JLC_12773_096.jpg                             | GES_depressa       | JLC 12773  |
| GES_shaferi_JLC_12786_012.jpg                             | GES_depressa       | JLC 12786  |
| GES_shaferi_JLC_12788_002.jpg                             | GES_depressa       | JLC 12788  |
| GES_ventricosa_dunn.4.jpg                                 | GES_ventricosa     | no_voucher |
| GES_ventricosa_G940.3.jpg                                 | GES_ventricosa     | LHBH G940  |
| GES_ventricosa_JLC_6545.2.jpg                             | GES_ventricosa     | JLC 6545   |
| GES_viridiflora_JLC_10509_35.jpg                          | GES_viridiflora    | JLC 10509  |
| GES_viridiflora_JLC_10540_01.jpg                          | GES_viridiflora    | JLC 10540  |
| GES_viridiflora_JLC_10552_21.jpg                          | GES_viridiflora    | JLC 10552  |

Table S2: Continued...

| FileName                                      | CodeSpecies          | Voucher             |
|-----------------------------------------------|----------------------|---------------------|
| GES_viridiflora_JLC_10554_20.jpg              | GES_viridiflora      | JLC 10554           |
| GES_viridiflora_JLC_10555_29.jpg              | GES_viridiflora      | JLC 10555           |
| GES_viridiflora_JLC_12797_14.jpg              | GES_viridiflora      | JLC 12797           |
| GES_yamuriensis_JLC_10575_01.jpg              | GES_yamuriensis      | JLC 10575           |
| RHY_auriculatum_USBRG_97_113_1.jpg            | RHY_auriculatum      | USBRG               |
| RHY_berteroanum_77_227_4.jpg                  | RHY_berteroanum      | no_voucher          |
| RHY_berteroanum_G1398_G1257_G841_1.jpg        | RHY_berteroanum      | LHBH                |
| RHY_berteroanum_JUL81W5_16.jpg                | RHY_berteroanum      | no_voucher          |
| RHY_crenulatum_JLC_10042_38.jpg               | RHY_crenulatum       | JLC 10042           |
| RHY_crenulatum_JLC_10580_10.jpg               | RHY_crenulatum       | JLC 10580           |
| RHY_crenulatum_JLC_10582_02.jpg               | RHY_crenulatum       | JLC 10582           |
| RHY_crenulatum_JLC_12803_09.jpg               | RHY_crenulatum       | JLC 12803           |
| RHY_earlei_JLC_10458_02.jpg                   | RHY_earlei           | JLC 10458           |
| RHY_earlei_JLC_10486_19.jpg                   | RHY_earlei           | JLC 10486           |
| RHY_exsertum_JLC_10508_12.jpg                 | RHY_exsertum         | JLC 10508           |
| RHY_exsertum_JLC_10538_07.jpg                 | RHY_exsertum         | JLC 10538           |
| RHY_exsertum_JLC_10546_07.jpg                 | RHY_exsertum         | JLC 10546           |
| RHY_exsertum_JLC_10551_03.jpg                 | RHY_exsertum         | JLC 10551           |
| RHY_exsertum_JLC_10565_08.jpg                 | RHY_exsertum         | JLC 10565           |
| RHY_exsertum_JLC_10569_05.jpg                 | RHY_exsertum         | JLC 10569           |
| RHY_exsertum_JLC_10579_01.jpg                 | RHY_exsertum         | JLC 10579           |
| RHY_exsertum_JLC_10585_18.jpg                 | RHY_exsertum         | JLC 10585           |
| RHY_exsertum_JLC_12770_23.jpg                 | RHY_exsertum         | JLC 12770           |
| RHY_exsertum_JLC_12787_14.jpg                 | RHY_exsertum         | JLC 12787           |
| RHY_grandiflorum_APR72r9_8.jpg                | RHY_grandiflorum     | no_voucher          |
| RHY_grandiflorum_cornell_1.jpg                | RHY_grandiflorum     | no_voucher          |
| RHY_intermedium_JLC_10547_10.jpg              | RHY_intermedium      | JLC 10547           |
| RHY_leucomallon_G1232_1.jpg                   | RHY_leucomallon      | LHBH G1232          |
| RHY_lomensis_JLC_10469_23.jpg                 | RHY_lomense          | JLC 10469           |
| RHY_lomensis_JLC_10470_24.jpg                 | RHY_lomense          | JLC 10470           |
| RHY_lomensis_JLC_10471_01.jpg                 | RHY_lomense          | JLC 10471           |
| RHY_minus_JLC_10500_34.jpg                    | RHY_minus            | JLC 10500           |
| RHY_rupincola_JLC_11308_18.jpg                | RHY_rupincola        | JLC 11308           |
| RHY_rupincola_JLC_11957_36.jpg                | RHY_rupincola        | JLC 11957           |
| RHY_tomentosum_apr72r1_11.jpg                 | RHY_tomentosum       | no_voucher          |
| RHY_tomentosum_jlc_10477_06.jpg               | RHY_tomentosum       | JLC 10477           |
| GES_aspera_2014-011.jpg                       | GES_aspera           | Lambert 2014-011    |
| GES_cubensis_2014-008.jpg                     | GES_cubensis         | Lambert 2014-008    |
| GES_viridiflora_acrochordonanthe_2014-028.jpg | GES_acrochordonanthe | Lambert 2014-028    |
| RHY_auriculatum_2014-014.jpg                  | RHY_auriculatum      | Lambert 2014-014    |
| RHY_auriculatum_2014-025.jpg                  | RHY_auriculatum      | Lambert 2014-025    |
| RHY_bicolor_2014-001.jpg                      | RHY_bicolor          | Lambert 2014-001    |
| RHY_bullatum_2014-016.jpg                     | RHY_bullatum         | Lambert 2014-016    |
| RHY_ekmanii_2014-020.jpg                      | GES_ekmanii          | Lambert 2014-020    |
| RHY_ekmanii_2014-024.jpg                      | GES_ekmanii          | Lambert 2014-024    |
| RHY_nov.sp._2014-010.jpg                      | GES_sp               | Lambert 2014-010    |
| RHY_sp_2014-022.jpg                           | RHY_sp               | Lambert 2014-022    |
| RHY_bicolor_2014-002.jpg                      | RHY_bicolor          | Lambert 2014-002    |
| GES_cuneifolia_JBM.jpg                        | GES_cuneifolia       | JBM                 |
| GES_pedicellaris_JBM.jpg                      | GES_pedicellaris     | JBM 932-1971        |
| GES_ventricosa_JBM.jpg                        | GES_ventricosa       | Léveillé-Bourret G4 |
| RHY_auriculatum_JBM.jpg                       | RHY_auriculatum      | JBM 937-1971        |
| RHY_exsertum_JBM.jpg                          | RHY_exsertum         | Léveillé-Bourret G1 |
| RHY_rupincola_JBM.jpg                         | RHY_rupincola        | JBM 113-1991        |
| RHY_tomentosum_JBM.jpg                        | RHY_tomentosum       | Léveillé-Bourret G2 |
| RHY_vernicosum_JBM.jpg                        | RHY_vernicosum       | Léveillé-Bourret G3 |
| GES_sintenisii_JLC_13757_19.jpg               | GES_sintenisii       | JLC 13757           |
| GES_acrochordonanthe_JLC_14467_090.jpg        | GES_acrochordonanthe | JLC 14467           |
| GES_acrochordonanthe_JLC_14522_045.jpg        | GES_acrochordonanthe | JLC 14522           |
| GES_glandulosa_JLC_14572_026.jpg              | GES_glandulosa       | JLC 14572           |
| RHY_auriculatum_JLC_14319_34.jpg              | RHY_auriculatum      | JLC 14319           |
| RHY_auriculatum_JLC_14387_37.jpg              | RHY_auriculatum      | JLC 14387           |
| RHY_auriculatum_JLC_14434_01.jpg              | RHY_auriculatum      | JLC 14434           |
| RHY_auriculatum_JLC_14499_10.jpg              | RHY_auriculatum      | JLC 14499           |
| RHY_auriculatum_JLC_14523_028.jpg             | RHY_auriculatum      | JLC 14523           |

**Table S2:** Continued...

| FileName                          | CodeSpecies     | Voucher   |
|-----------------------------------|-----------------|-----------|
| RHY_bicolor_JLC_14321_109.jpg     | RHY_bicolor     | JLC 14321 |
| RHY_bicolor_JLC_14364_05.jpg      | RHY_bicolor     | JLC 14364 |
| RHY_bicolor_JLC_14493_07.jpg      | RHY_bicolor     | JLC 14493 |
| RHY_leucomallon_JLC_14338_031.jpg | RHY_leucomallon | JLC 14338 |
| RHY_leucomallon_JLC_14497_09.jpg  | RHY_leucomallon | JLC 14497 |
| RHY_leucomallon_JLC_14498_10.jpg  | RHY_leucomallon | JLC 14498 |
| RHY_nov.sp._JLC_14460_081.jpg     | GES_sp          | JLC 14460 |



**Table S3:** Voucher information for the specimens sequenced in the study.

| Species                   | Collector            | Collection number | Herbarium | Museum ID  | F3H       | uf3gt     | chi       | cycloidea | gapdh     |
|---------------------------|----------------------|-------------------|-----------|------------|-----------|-----------|-----------|-----------|-----------|
| Bellonia spinosa          | Clark, J.            | 10573             | UNA       | MT-179392  |           |           | sequenced | sequenced | sequenced |
| Bellonia spinosa          | Léveillé-Bourret, É. | G8                | MT        | MT-184105  | sequenced | sequenced | sequenced |           |           |
| Gesneria acaulis          | Clark, J.            | 11303             | UNA       | MT-179400  | sequenced |           | sequenced | sequenced | sequenced |
| Gesneria acaulis          | Martén-Rodriguez, S. | US-3479058-1188   | US        |            |           |           |           | GU323229  |           |
| Gesneria acrochordonanthe | Lambert, F.          | 2014-027          | MT        | MT-194054  |           |           | sequenced | sequenced |           |
| Gesneria acrochordonanthe | Lambert, F.          | 2014-028          | MT        | MT-194056  | sequenced | sequenced | sequenced | sequenced |           |
| Gesneria aspera           | Lambert, F.          | 2014-011          | MT        | MT-194032  | sequenced |           | sequenced | sequenced |           |
| Gesneria bracteosa        | Clark, J.            | 10567             | UNA       | MT-179575  | sequenced | sequenced | sequenced | sequenced | sequenced |
| Gesneria christii         | Clark, J.            | 10025             | UNA       |            | sequenced |           | sequenced | sequenced |           |
| Gesneria christii         | Léveillé-Bourret, É. | G6                | MT        | MT-184103  | sequenced | sequenced | sequenced | sequenced | sequenced |
| Gesneria christii         | ??                   | SI 94-507         | ??        |            |           |           |           | AY363923  |           |
| Gesneria citrina          | Clark, J.            | 10020             | UNA       |            | sequenced |           |           | sequenced |           |
| Gesneria citrina          | Martén-Rodriguez, S. | 1248              |           |            |           |           |           | GU323232  |           |
| Gesneria clarensis        | Clark, J.            | 10488             | UNA       | MT-179401  | sequenced | sequenced | sequenced | sequenced | sequenced |
| Gesneria cubensis         | Lambert, F.          | 2014-008          | MT        | MT-194027  | sequenced |           | sequenced | sequenced |           |
| Gesneria cubensis         | Martén-Rodriguez, S. | MTSD-109650-1232  | UNA       |            |           |           |           | GU323234  |           |
| Gesneria cuneifolia       | Martén-Rodriguez, S. | 1247              |           |            |           |           |           | GU323235  |           |
| Gesneria ekmanii          | Lambert, F.          | 2014-018          | MT        | MT-194044  | sequenced | sequenced | sequenced | sequenced |           |
| Gesneria ekmanii          | Lambert, F.          | 2014-020          | MT        | MT-194046  | sequenced | sequenced | sequenced | sequenced | sequenced |
| Gesneria ekmanii          | Lambert, F.          | 2014-024          | MT        | MT-194050  | sequenced |           | sequenced | sequenced |           |
| Gesneria ferruginea       | Clark, J.            | 10627             | UNA       | MT-179294  |           | sequenced | sequenced | sequenced | sequenced |
| Gesneria fruticosa        | Lambert, F.          | 2014-012          | MT        | MT-194035  | sequenced | sequenced | sequenced | sequenced | sequenced |
| Gesneria fruticosa        | Martén-Rodriguez, S. | JBSD-109606-1227  | UNA       | MT-179391  |           |           |           | GU323238  |           |
| Gesneria humilis          | Clark, J.            | 10626             | UNA       | MT-179385  | sequenced | sequenced | sequenced | sequenced | sequenced |
| Gesneria humilis          | Clark, J.            | 10040             | UNA       | MT-179363  | sequenced | sequenced | sequenced | sequenced | sequenced |
| Gesneria humilis          | Clark, J.            | 10472             | UNA       |            | sequenced | sequenced | sequenced | sequenced | sequenced |
| Gesneria humilis          | Clark, J.            | 10574             | UNA       |            |           |           | sequenced | sequenced |           |
| Gesneria humilis          | Chautems             | 1179              |           |            |           |           |           | AY423156  |           |
| Gesneria nipensis         | Clark, J.            | 10577             | UNA       | MT-179356  | sequenced |           |           | sequenced |           |
| Gesneria pedicellaris     | Clark, J.            | 10635             | UNA       | MT-179354  | sequenced | sequenced | sequenced | sequenced |           |
| Gesneria pedicellaris     | Martén-Rodriguez, S. | US-3498534-1229   | US        |            |           |           |           | GU323241  |           |
| Gesneria pedunculosa      | Martén-Rodriguez, S. | 1251              |           |            |           |           |           | GU323242  |           |
| Gesneria pedunculosa      | Clark, J.            | 10644             | UNA       | MT-179353  | sequenced | sequenced | sequenced | sequenced |           |
| Gesneria pulverulenta     | Martén-Rodriguez, S. | US-3498527-1237   | US        |            |           |           |           | GU323243  |           |
| Gesneria pumila           | Martén-Rodriguez, S. | 1194              | UNA       | MT-179573  |           |           |           | GU323244  |           |
| Gesneria purpurascens     | Clark, J.            | 10564             | UNA       | MT-179351  | sequenced | sequenced | sequenced | sequenced | sequenced |
| Gesneria quisqueyana      | Martén-Rodriguez, S. | US-3498533-1230   | US        |            |           |           |           | GU323245  |           |
| Gesneria reticulata       | Clark, J.            | 10558             | UNA       | MT-179347  | sequenced | sequenced | sequenced | sequenced |           |
| Gesneria reticulata       | Martén-Rodriguez, S. | US-3498539-1221   | US        |            |           |           |           | GU323246  |           |
| Gesneria salicifolia      | Clark, J.            | 10566             | UNA       | MT-179316  | sequenced |           | sequenced | sequenced | sequenced |
| Gesneria depressa         | Clark, J.            | 13070             | UNA       |            | sequenced |           |           | sequenced |           |
| Gesneria sintenisii       | Clark, J.            | 13757             | UNA       |            | sequenced | sequenced | sequenced | sequenced |           |
| Gesneria sintenisii       | Martén-Rodriguez, S. | 1252              |           | US-3594111 |           |           |           | GU323250  |           |
| Gesneria ventricosa       | Clark, J.            | 6545              | UNA       | MT-179344  | sequenced |           |           | sequenced | sequenced |
| Gesneria ventricosa       | Léveillé-Bourret, É. | G4                | MT        | MT-184101  | sequenced | sequenced | sequenced | sequenced | sequenced |
| Gesneria ventricosa       | Martén-Rodriguez, S. | 1112A             |           |            |           |           |           | GU323249  |           |

Table S3: Continued...

| Species                            | Collector            | Collection number | Herbarium  | Museum ID | F3H       | uf3gt     | chi       | cycloidea | gapdh     |
|------------------------------------|----------------------|-------------------|------------|-----------|-----------|-----------|-----------|-----------|-----------|
| <i>Gesneria viridiflora</i>        | Clark, J.            | 10561             | UNA        | MT-179396 |           |           |           | sequenced |           |
| <i>Gesneria viridiflora</i>        | Clark, J.            | 10524             | UNA        | MT-179386 | sequenced | sequenced |           | sequenced |           |
| <i>Gesneria viridiflora</i>        | Clark, J.            | 10561             | UNA        | MT-179396 |           | sequenced |           | sequenced |           |
| <i>Gesneria viridiflora</i>        | Clark, J.            | 10509             | UNA        |           |           |           |           | sequenced |           |
| <i>Gesneria viridiflora</i>        | Clark, J.            | 10540             | UNA        |           | sequenced |           |           | sequenced |           |
| <i>Gesneria viridiflora</i>        | Clark, J.            | 10041             | UNA        |           |           |           |           | sequenced |           |
| <i>Gesneria viridiflora</i>        | Hahn                 | 440               | ??         |           |           |           |           | AY626227  |           |
| <i>Gesneria yumuriensis</i>        | Clark, J.            | 10575             | UNA        | MT-179275 | sequenced | sequenced | sequenced | sequenced | sequenced |
| <i>Henckelia malayana</i>          | Léveillé-Bourret, É. | G11               | MT         | MT-184108 | sequenced |           | sequenced | sequenced |           |
| <i>Koehleria trinidad</i>          | no voucher           |                   | MT         |           |           |           | sequenced | sequenced |           |
| <i>Rhytidophyllum auriculatum</i>  | Lambert, F.          | 2014-014          | MT         | MT-194038 | sequenced | sequenced | sequenced | sequenced | sequenced |
| <i>Rhytidophyllum auriculatum</i>  | Lambert, F.          | 2014-025          | MT         | MT-194051 | sequenced | sequenced |           | sequenced |           |
| <i>Rhytidophyllum auriculatum</i>  | no voucher           |                   | MT         |           | sequenced | sequenced |           | sequenced | sequenced |
| <i>Rhytidophyllum auriculatum</i>  | Martén-Rodriguez, S. | US-3498538-1222   | US         |           |           |           |           | GU323253  |           |
| <i>Rhytidophyllum berterioanum</i> | Martén-Rodriguez, S. | JBSD-109605-1226  |            |           |           |           |           | GU323254  |           |
| <i>Rhytidophyllum bicolor</i>      | Lambert, F.          | 2014-002          | MT         | MT-194022 | sequenced | sequenced | sequenced | sequenced | sequenced |
| <i>Rhytidophyllum bicolor</i>      | Lambert, F.          | 2014-001          | MT         | MT-194020 | sequenced | sequenced | sequenced | sequenced | sequenced |
| <i>Rhytidophyllum bullatum</i>     | Lambert, F.          | 2014-016          | MT         | MT-194041 | sequenced | sequenced | sequenced | sequenced |           |
| <i>Rhytidophyllum crenulatum</i>   | Clark, J.            | 9531              | UNA        | MT-179273 | sequenced | sequenced | sequenced | sequenced | sequenced |
| <i>Rhytidophyllum crenulatum</i>   | Clark, J.            | 10580             | UNA        |           |           |           |           | GU323255  |           |
| <i>Rhytidophyllum earlei</i>       | Clark, J.            | 10486             | UNA        | MT-179402 | sequenced | sequenced | sequenced | sequenced | sequenced |
| <i>Rhytidophyllum earlei</i>       | Clark, J.            | 10458             | UNA        | MT-179399 | sequenced | sequenced | sequenced | sequenced | sequenced |
| <i>Rhytidophyllum exsertum</i>     | Léveillé-Bourret, É. | G1                | MT         | MT-184098 | sequenced | sequenced | sequenced | sequenced | sequenced |
| <i>Rhytidophyllum exsertum</i>     | Clark, J.            | 10038             | UNA        | MT-179270 | sequenced | sequenced | sequenced | sequenced | sequenced |
| <i>Rhytidophyllum exsertum</i>     | Clark, J.            | 10585             | UNA        |           | sequenced |           | sequenced |           |           |
| <i>Rhytidophyllum exsertum</i>     | Skog, L.             | 1197-14           |            |           |           |           |           | GU323256  |           |
| <i>Rhytidophyllum grandiflorum</i> | Martén-Rodriguez, S. | US-3498536-1224   | US         |           |           |           |           | GU323257  |           |
| <i>Rhytidophyllum intermedium</i>  | Clark, J.            | 10549             | UNA        |           | sequenced | sequenced | sequenced | sequenced | sequenced |
| <i>Rhytidophyllum leucomallon</i>  | Acevedo, P.          | 13966             |            |           |           |           |           | GU323258  |           |
| <i>Rhytidophyllum lomense</i>      | Clark, J.            | 10466             | UNA        | MT-179361 | sequenced |           | sequenced | sequenced | sequenced |
| <i>Rhytidophyllum lomense</i>      | Clark, J.            | 10469             | UNA        | MT-179358 | sequenced | sequenced | sequenced | sequenced | sequenced |
| <i>Rhytidophyllum minus</i>        | Clark, J.            | 10500             | UNA        | MT-179350 | sequenced | sequenced | sequenced | sequenced |           |
| <i>Rhytidophyllum onacaensis</i>   | Carbono, E.          | 9085              | UNA        | MT-179308 | sequenced | sequenced | sequenced | sequenced | sequenced |
| <i>Rhytidophyllum rupincola</i>    | Clark, J.            | 11261             | UNA        | MT-179403 | sequenced |           | sequenced | sequenced | sequenced |
| <i>Rhytidophyllum rupincola</i>    | Clark, J.            | 11957             | UNA        | MT-179265 | sequenced |           | sequenced | sequenced | sequenced |
| <i>Rhytidophyllum rupincola</i>    | Léveillé-Bourret, É. | G5                | MT         | MT-184102 | sequenced | sequenced |           | sequenced | sequenced |
| <i>Rhytidophyllum rupincola</i>    | Martén-Rodriguez, S. | 1253              |            |           |           |           |           | GU323247  |           |
| <i>Rhytidophyllum</i> sp.          | Lambert, F.          | 2014-017          | MT         | MT-194043 | sequenced |           | sequenced | sequenced |           |
| <i>Rhytidophyllum</i> sp.          | Lambert, F.          | 2014-022          | MT         | MT-194049 | sequenced |           | sequenced | sequenced |           |
| <i>Rhytidophyllum</i> sp. nov 1    | Lambert, F.          | 2014-010          | MT         | MT-194030 | sequenced | sequenced | sequenced | sequenced | sequenced |
| <i>Rhytidophyllum</i> sp. nov 1    | Lambert, F.          | 2014-009          | MT         | MT-194029 | sequenced | sequenced | sequenced | sequenced | sequenced |
| <i>Rhytidophyllum</i> sp. nov 1    | Lambert, F.          | 2014-007          | no voucher |           | sequenced | sequenced | sequenced | sequenced | sequenced |
| <i>Rhytidophyllum tomentosum</i>   | Léveillé-Bourret, É. | G2                | MT         | MT-184099 | sequenced | sequenced | sequenced | sequenced | sequenced |
| <i>Rhytidophyllum tomentosum</i>   | Martén-Rodriguez, S. | US-3479065-1191   |            |           |           |           |           | GU323260  |           |
| <i>Rhytidophyllum tomentosum</i>   | ??                   | SI77-235          |            |           |           |           |           | AY363926  |           |
| <i>Rhytidophyllum vernicosum</i>   | Léveillé-Bourret, É. | G3                | MT         | MT-184100 | sequenced | sequenced | sequenced | sequenced | sequenced |

**Table S3:** Continued...

| Species                          | Collector            | Collection number | Herbarium | Museum ID | F3H | uf3gt | chi | cycloidea | gapdh |
|----------------------------------|----------------------|-------------------|-----------|-----------|-----|-------|-----|-----------|-------|
| <i>Rhytidophyllum vernicosum</i> | Martén-Rodriguez, S. | US-3498520-1246   |           |           |     |       |     | GU323261  |       |

**Table S4:** Primer information for the gene amplification.

| Gene      | Primers   | Sequence (5' → 3')        | Annealing temperature |
|-----------|-----------|---------------------------|-----------------------|
| CYCLOIDEA | gCYCf2    | AAGGAGCTGGTGCAGGCTAAGA    | 54°C                  |
|           | gCYCr2    | GGGAGATTGCAGTTCAAATCCCTGA |                       |
| GAPDH     | GAPDHx1fb | TGCACTACTAACTGCCTTG       | 47°C                  |
|           | GAPDHx4rb | GCTGGAAGMACTTTGCCAACAGC   |                       |
| CHI       | CHI1F     | TCTGCATCGCTGTAGGTTCC      | 59°C                  |
|           | CHI1R     | GACATGTCTTGCCACCCAAC      |                       |
| UF3GT     | UF3GT1F   | TGCCAAAATCCACCGCTGTGT     | 51°C                  |
|           | UF3GT1R   | TGCAACTGAGGTGCCAGGA       |                       |
| F3H       | F3H2f     | ACGGAGGCCTACAGCGAGCA      | 56°C                  |
|           | F3H2R     | CCTGCAACCCACCCACCTGA      |                       |

Note: PCR reactions included 1 × buffer, 1 mM MgSO<sub>4</sub>, 1 U DreamTaq (Thermoscientific), 0.4 μM of each primer, 0.2 μM of each dNTPs, 1% PVP (M.W. 40,000), 50 μg BSA and ca. 30 ng of DNA.

**Table S5:** Number of transitions between the different pollination strategies according to the stochastic mapping when performed on species with confirmed and inferred pollination strategies. The median values obtained from the character simulations over the posterior distribution of species tree is reported as well as 95% credible intervals. Ancestral state are in rows.

|                   | bat               | bee               | hummingbird       | mixed-pollination | moth              |
|-------------------|-------------------|-------------------|-------------------|-------------------|-------------------|
| bat               | –                 | 0.25 [0.19, 0.22] | 3.74 [3.07, 4.40] | 3.70 [3.06, 4.30] | 0.22 [0.14, 0.34] |
| bee               | 0.06 [0.02, 0.10] | –                 | 0.05 [0.02, 0.10] | 0.08 [0.02, 0.14] | 0.03 [0.02, 0.05] |
| hummingbird       | 3.32 [2.55, 3.88] | 0.43 [0.37, 0.51] | –                 | 2.48 [2.00, 2.96] | 0.63 [0.44, 0.78] |
| mixed-pollination | 4.47 [3.82, 5.17] | 0.28 [0.20, 0.37] | 6.53 [5.54, 7.15] | –                 | 0.25 [0.14, 0.33] |
| moth              | 0.03 [0.02, 0.11] | 0.06 [0.04, 0.10] | 0.04 [0.01, 0.07] | 0.04 [0.02, 0.07] | –                 |

**Table S6:** Parameter values of the univariate evolutionary models fitted on the first three principal components of the morphospace when species with confirmed and inferred pollinators were included in the analyses. Mean values from the posterior distribution of species trees are given for the AICc weights, whereas median values are given for the parameter estimates. Numbers in brackets indicate the 25% and the 75% quantiles. The best model for each component is in bold. The  $\theta$  parameter indicate the global or regime means for the BM-type and OUBM-type models, whereas it indicates the stationary optimum trait for the OU-type models.  $station_{hum}$  and  $station_{mix}$  are the stationary distributions of the hummingbird and mixed-pollination strategies.

| <b>PC1</b>             |          |                         |                            |                               |                            |                            |                     |                     |                     |                     |
|------------------------|----------|-------------------------|----------------------------|-------------------------------|----------------------------|----------------------------|---------------------|---------------------|---------------------|---------------------|
| Models                 | p        | AICc weight             | $\theta_{hum}$             | $\theta_{mix}$                | $\sigma_{hum}^2$           | $\sigma_{mix}^2$           | $station_{hum}$     | $station_{mix}$     |                     |                     |
| BMI                    | 2        | 0 [0,0]                 | 0.042 [0.033,0.05]         | 0.042 [0.033,0.05]            | 0.105 [0.077,0.163]        | 0.105 [0.077,0.163]        | -                   | -                   | -                   | -                   |
| BMV                    | 3        | 0 [0,0]                 | 0.097 [0.033,0.137]        | 0.097 [0.033,0.137]           | 0.028 [0.016,0.13]         | 0.151 [0.059,0.285]        | -                   | -                   | -                   | -                   |
| <b>BMI<sub>m</sub></b> | <b>3</b> | <b>0.38 [0.03,0.69]</b> | <b>0.154 [0.148,0.162]</b> | <b>-0.129 [-0.139,-0.118]</b> | <b>0.015 [0.012,0.019]</b> | <b>0.015 [0.012,0.019]</b> | -                   | -                   | -                   | -                   |
| BMV <sub>m</sub>       | 4        | 0 [0,0]                 | 0.153 [0.143,0.16]         | -0.132 [-0.142,-0.122]        | 0.019 [0.013,0.025]        | 0.201 [0.009,0.014]        | -                   | -                   | -                   | -                   |
| OU1                    | 3        | 0 [0,0]                 | 0.031 [0.021,0.042]        | 0.031 [0.021,0.042]           | 0.207 [0.137,0.477]        | 0.207 [0.137,0.477]        | 0.033 [0.031,0.034] | 0.033 [0.031,0.034] | 0.005 [0.005,0.005] | 0.005 [0.005,0.005] |
| OU <sub>m</sub>        | 4        | 0.46 [0.03,0.95]        | 0.169 [0.165,0.172]        | -0.159 [-0.159,-0.158]        | 3.122 [0.916,17.092]       | 3.122 [0.916,17.092]       | 2.25 [1.027,5.547]  | 2.25 [1.027,5.547]  | 4.309 [1.556,7.299] | 4.309 [1.556,7.299] |
| OUMV                   | 5        | 0 [0,0]                 | 0.214 [0.192,0.23]         | -0.163 [-0.192,-0.075]        | 15.291 [4.636,43.424]      | 24.445 [10.766,50.789]     | 2.25 [1.027,5.547]  | 2.25 [1.027,5.547]  | 3.587 [2.64,4.543]  | 3.587 [2.64,4.543]  |
| OUMA                   | 5        | 0 [0,0]                 | 0.218 [0.198,0.247]        | -0.159 [-0.196,-0.08]         | 21.291 [12.123,39.902]     | 21.291 [12.123,39.902]     | 2.414 [1.005,4.92]  | 2.414 [1.005,4.92]  | 4.403 [1.848,7.136] | 4.403 [1.848,7.136] |
| OUMVA                  | 6        | 0 [0,0]                 | 0.214 [0.19,0.231]         | -0.162 [-0.195,-0.096]        | 17.889 [4.882,42.186]      | 24.258 [10.321,52.843]     | 0.014 [0.007,0.017] | 0.014 [0.007,0.017] | -                   | -                   |
| OUBM <sub>i</sub>      | 4        | 0 [0,0]                 | 0.123 [0.096,0.146]        | 0.123 [0.096,0.146]           | 1.797 [0.663,43.782]       | 0.038 [0.018,0.119]        | -                   | -                   | -                   | -                   |
| BMOU <sub>i</sub>      | 4        | 0 [0,0]                 | -0.053 [-0.074,-0.03]      | -0.053 [-0.074,-0.03]         | 0.033 [0.021,0.066]        | 2.751 [0.442,33.744]       | 0.005 [0.004,0.007] | 0.005 [0.004,0.007] | 0.019 [0.013,0.023] | 0.019 [0.013,0.023] |
| OUBM                   | 3        | 0 [0,0]                 | 0.15 [0.118,0.177]         | 0.15 [0.118,0.177]            | 0.171 [0.118,0.285]        | 0.171 [0.118,0.285]        | -                   | -                   | -                   | -                   |
| BMOU                   | 3        | 0 [0,0]                 | -0.091 [-0.119,-0.036]     | -0.091 [-0.119,-0.036]        | 0.188 [0.122,0.336]        | 0.188 [0.122,0.336]        | -                   | -                   | -                   | -                   |

  

| <b>PC2</b>        |          |                         |                              |                              |                           |                           |                            |                            |                            |                            |
|-------------------|----------|-------------------------|------------------------------|------------------------------|---------------------------|---------------------------|----------------------------|----------------------------|----------------------------|----------------------------|
| Models            | p        | AICc weight             | $\theta_{hum}$               | $\theta_{mix}$               | $\sigma_{hum}^2$          | $\sigma_{mix}^2$          | $station_{hum}$            | $station_{mix}$            |                            |                            |
| BMI               | 2        | 0 [0,0]                 | -0.033 [-0.036,-0.03]        | -0.033 [-0.036,-0.03]        | 0.021 [0.016,0.035]       | 0.021 [0.016,0.035]       | -                          | -                          | -                          | -                          |
| BMV               | 3        | 0 [0,0]                 | -0.032 [-0.037,-0.027]       | -0.032 [-0.037,-0.027]       | 0.029 [0.02,0.055]        | 0.009 [0.007,0.012]       | -                          | -                          | -                          | -                          |
| BM1 <sub>m</sub>  | 3        | 0 [0,0]                 | -0.018 [-0.024,-0.012]       | -0.057 [-0.064,-0.051]       | 0.019 [0.014,0.033]       | 0.019 [0.014,0.033]       | -                          | -                          | -                          | -                          |
| BMV <sub>m</sub>  | 4        | 0 [0,0]                 | -0.012 [-0.02,0]             | -0.05 [-0.059,-0.039]        | 0.028 [0.019,0.052]       | 0.007 [0.005,0.009]       | -                          | -                          | -                          | -                          |
| <b>OU1</b>        | <b>3</b> | <b>0.53 [0.45,0.65]</b> | <b>-0.028 [-0.03,-0.026]</b> | <b>-0.028 [-0.03,-0.026]</b> | <b>0.223 [0.075,0.99]</b> | <b>0.223 [0.075,0.99]</b> | <b>0.003 [0.003,0.003]</b> | <b>0.003 [0.003,0.003]</b> | <b>0.003 [0.003,0.003]</b> | <b>0.003 [0.003,0.003]</b> |
| OUM               | 4        | 0.26 [0.23,0.32]        | -0.04 [-0.043,-0.034]        | -0.017 [-0.019,-0.014]       | 0.169 [0.075,0.662]       | 0.169 [0.075,0.662]       | 0.003 [0.003,0.003]        | 0.003 [0.003,0.003]        | 0.003 [0.003,0.003]        | 0.003 [0.003,0.003]        |
| OUMV              | 5        | 0.05 [0.01,0.07]        | -0.049 [-0.055,-0.038]       | -0.02 [-0.027,-0.012]        | 9.117 [5.89,13.777]       | 3.756 [2.774,5.29]        | 1.132 [0.884,1.613]        | 1.132 [0.884,1.613]        | 0.482 [0.408,0.568]        | 0.482 [0.408,0.568]        |
| OUMA              | 5        | 0.02 [0,0.03]           | -0.049 [-0.056,-0.039]       | -0.016 [-0.026,-0.008]       | 6.422 [4.583,9.904]       | 6.422 [4.583,9.904]       | 0.796 [0.7,0.974]          | 0.796 [0.7,0.974]          | 0.796 [0.7,0.974]          | 0.796 [0.7,0.974]          |
| OUMVA             | 6        | 0.01 [0,0.02]           | -0.049 [-0.056,-0.038]       | -0.02 [-0.028,-0.012]        | 9.189 [5.72,13.364]       | 3.717 [2.825,5.463]       | 1.117 [0.865,1.458]        | 1.117 [0.865,1.458]        | 0.486 [0.411,0.583]        | 0.486 [0.411,0.583]        |
| OUBM <sub>i</sub> | 4        | 0.1 [0.01,0.06]         | -0.041 [-0.047,-0.035]       | -0.041 [-0.047,-0.035]       | 0.289 [0.11,1.407]        | 0.006 [0.004,0.009]       | 0.003 [0.003,0.003]        | 0.003 [0.003,0.003]        | -                          | -                          |
| BMOU <sub>i</sub> | 4        | 0.01 [0,0]              | -0.023 [-0.033,-0.017]       | -0.023 [-0.033,-0.017]       | 0.028 [0.019,0.049]       | 0.045 [0.023,0.225]       | -                          | -                          | -                          | -                          |
| OUBM              | 3        | 0 [0,0]                 | -0.045 [-0.051,-0.037]       | -0.045 [-0.051,-0.037]       | 0.032 [0.021,0.05]        | 0.032 [0.021,0.05]        | -                          | -                          | -                          | -                          |
| BMOU              | 3        | 0 [0,0]                 | -0.024 [-0.033,-0.017]       | -0.024 [-0.033,-0.017]       | 0.03 [0.021,0.051]        | 0.03 [0.021,0.051]        | -                          | -                          | -                          | -                          |

  

| <b>PC3</b>        |          |                        |                            |                            |                            |                            |                            |                            |                            |                            |
|-------------------|----------|------------------------|----------------------------|----------------------------|----------------------------|----------------------------|----------------------------|----------------------------|----------------------------|----------------------------|
| Models            | p        | AICc weight            | $\theta_{hum}$             | $\theta_{mix}$             | $\sigma_{hum}^2$           | $\sigma_{mix}^2$           | $station_{hum}$            | $station_{mix}$            |                            |                            |
| BMI               | 2        | 0.02 [0,0.03]          | 0.018 [0.015,0.019]        | 0.018 [0.015,0.019]        | 0.004 [0.004,0.005]        | 0.004 [0.004,0.005]        | -                          | -                          | -                          | -                          |
| BMV               | 3        | 0.01 [0,0.01]          | 0.017 [0.015,0.019]        | 0.017 [0.015,0.019]        | 0.005 [0.005,0.007]        | 0.003 [0.003,0.005]        | -                          | -                          | -                          | -                          |
| BM1 <sub>m</sub>  | 3        | 0.12 [0.03,0.16]       | 0.031 [0.028,0.034]        | -0.004 [-0.009,-0.001]     | 0.004 [0.003,0.004]        | 0.004 [0.003,0.004]        | -                          | -                          | -                          | -                          |
| BMV <sub>m</sub>  | 4        | 0.05 [0.02,0.08]       | 0.035 [0.03,0.039]         | -0.001 [-0.004,0.003]      | 0.005 [0.004,0.006]        | 0.002 [0.002,0.003]        | -                          | -                          | -                          | -                          |
| <b>OU1</b>        | <b>3</b> | <b>0.3 [0.13,0.45]</b> | <b>0.015 [0.014,0.016]</b> | <b>0.015 [0.014,0.016]</b> | <b>0.019 [0.013,0.107]</b> | <b>0.019 [0.013,0.107]</b> | <b>0.002 [0.002,0.002]</b> | <b>0.002 [0.002,0.002]</b> | <b>0.002 [0.002,0.002]</b> | <b>0.002 [0.002,0.002]</b> |
| OUM               | 4        | 0.1 [0.03,0.15]        | 0.018 [0.016,0.021]        | 0.01 [0.009,0.013]         | 0.02 [0.013,0.209]         | 0.02 [0.013,0.209]         | 0.002 [0.001,0.002]        | 0.002 [0.001,0.002]        | 0.002 [0.001,0.002]        | 0.002 [0.001,0.002]        |
| OUMV              | 5        | 0.12 [0.03,0.16]       | 0.022 [0.017,0.029]        | 0.01 [0.005,0.017]         | 2.865 [2.249,3.919]        | 0.854 [0.702,1.063]        | 0.449 [0.394,0.524]        | 0.449 [0.394,0.524]        | 0.146 [0.118,0.17]         | 0.146 [0.118,0.17]         |
| OUMA              | 5        | 0.03 [0.01,0.04]       | 0.022 [0.016,0.026]        | 0.01 [0.005,0.018]         | 1.359 [1.089,1.744]        | 1.359 [1.089,1.744]        | 0.275 [0.249,0.301]        | 0.275 [0.249,0.301]        | 0.275 [0.249,0.301]        | 0.275 [0.249,0.301]        |
| OUMVA             | 6        | 0.02 [0.01,0.03]       | 0.023 [0.019,0.029]        | 0.01 [0.006,0.017]         | 2.135 [1.616,2.726]        | 0.733 [0.569,0.944]        | 0.399 [0.348,0.467]        | 0.399 [0.348,0.467]        | 0.148 [0.118,0.177]        | 0.148 [0.118,0.177]        |
| OUBM <sub>i</sub> | 4        | 0.01 [0,0.01]          | 0.017 [0.014,0.02]         | 0.017 [0.014,0.02]         | 0.015 [0.01,0.027]         | 0.003 [0.002,0.004]        | -                          | -                          | -                          | -                          |
| BMOU <sub>i</sub> | 4        | 0.13 [0.02,0.16]       | 0.016 [0.014,0.017]        | 0.016 [0.014,0.017]        | 0.004 [0.004,0.005]        | 0.048 [0.02,0.229]         | -                          | -                          | -                          | -                          |
| OUBM              | 3        | 0.01 [0,0.01]          | 0.018 [0.015,0.021]        | 0.018 [0.015,0.021]        | 0.005 [0.004,0.007]        | 0.005 [0.004,0.007]        | -                          | -                          | -                          | -                          |
| BMOU              | 3        | 0.08 [0.01,0.1]        | 0.015 [0.012,0.017]        | 0.015 [0.012,0.017]        | 0.006 [0.006,0.008]        | 0.006 [0.006,0.008]        | -                          | -                          | -                          | -                          |

**Table S7:** Matrix of stationary variance estimates obtained with the OUM multivariate model, averaged over the posterior distribution of species trees with only species with confirmed pollination strategies. Median values are reported and numbers in brackets indicate the 25% and the 75% quantiles.

|     | PC1                         | PC2                           | PC3                     |
|-----|-----------------------------|-------------------------------|-------------------------|
| PC1 | 0.0058 [0.0055, 0.0062]     |                               |                         |
| PC2 | 0.00063 [0.00053, 0.00081]  | 0.0029 [0.0029, 0.0030]       |                         |
| PC3 | -0.0010 [-0.0013, -0.00070] | -0.00058 [-0.00064, -0.00053] | 0.0020 [0.0018, 0.0022] |

**Table S8:** Model performance with the multivariate evolutionary models fitted on the first three principal components of the morphospace when all species were included in the analyses, including those with inferred pollinator strategies. The mean values obtained from the posterior distribution of species trees are given; numbers in brackets indicate the 25% and the 75% quantiles. The best model is in bold.

| models     | logLik                        | param     | AICc weight       |
|------------|-------------------------------|-----------|-------------------|
| BM1        | 108.11 [98.93,120.48]         | 9         | 0 [0,0]           |
| BMV        | 119.69 [112.64,128.69]        | 15        | 0 [0,0]           |
| BM1m       | 140.93 [133.11,152.03]        | 12        | 0 [0,0.01]        |
| BMVm       | 147.9 [140.66,156.66]         | 18        | 0 [0,0]           |
| OU1        | 136.62 [132.59,140.57]        | 15        | 0 [0,0]           |
| <b>OUM</b> | <b>164.32 [162.02,166.75]</b> | <b>18</b> | <b>1 [0.99,1]</b> |
| OUBM       | 123.15 [117.04,131.4]         | 15        | 0 [0,0]           |
| BMOU       | 121.65 [115.22,130.89]        | 15        | 0 [0,0]           |
| OUBMr      | 142.66 [140.17,146.98]        | 21        | 0 [0,0]           |
| BMOUr      | 130.75 [123.82,139.6]         | 21        | 0 [0,0]           |



**Table S9:** Model parameters for the multivariate OUM model, which was the model that received the highest *AICc* weight (Table S8), when all species are included in the analysis. The mean values obtained from the posterior distribution of species trees are given; numbers in brackets indicate the 25% and the 75% quantiles.

| parameters            | PC1                   | PC2                    | PC3                 |
|-----------------------|-----------------------|------------------------|---------------------|
| $\theta_{hum}$        | 0.173 [0.169,0.177]   | -0.042 [-0.052,-0.037] | 0.015 [0.008,0.019] |
| $\theta_{mix}$        | -0.16 [-0.162,-0.158] | -0.017 [-0.018,-0.014] | 0.011 [0.009,0.016] |
| $\sigma^2$            | 3.132 [0.987,10.306]  | 0.7 [0.232,2.32]       | 0.091 [0.018,0.372] |
| phylogenetic halftime | 0.001 [0,0.003]       | 0.013 [0.004,0.039]    | 0.122 [0.079,0.21]  |
| stationary variance   | 0.004 [0.004,0.005]   | 0.003 [0,0]            | 0.001 [-0.001,0]    |

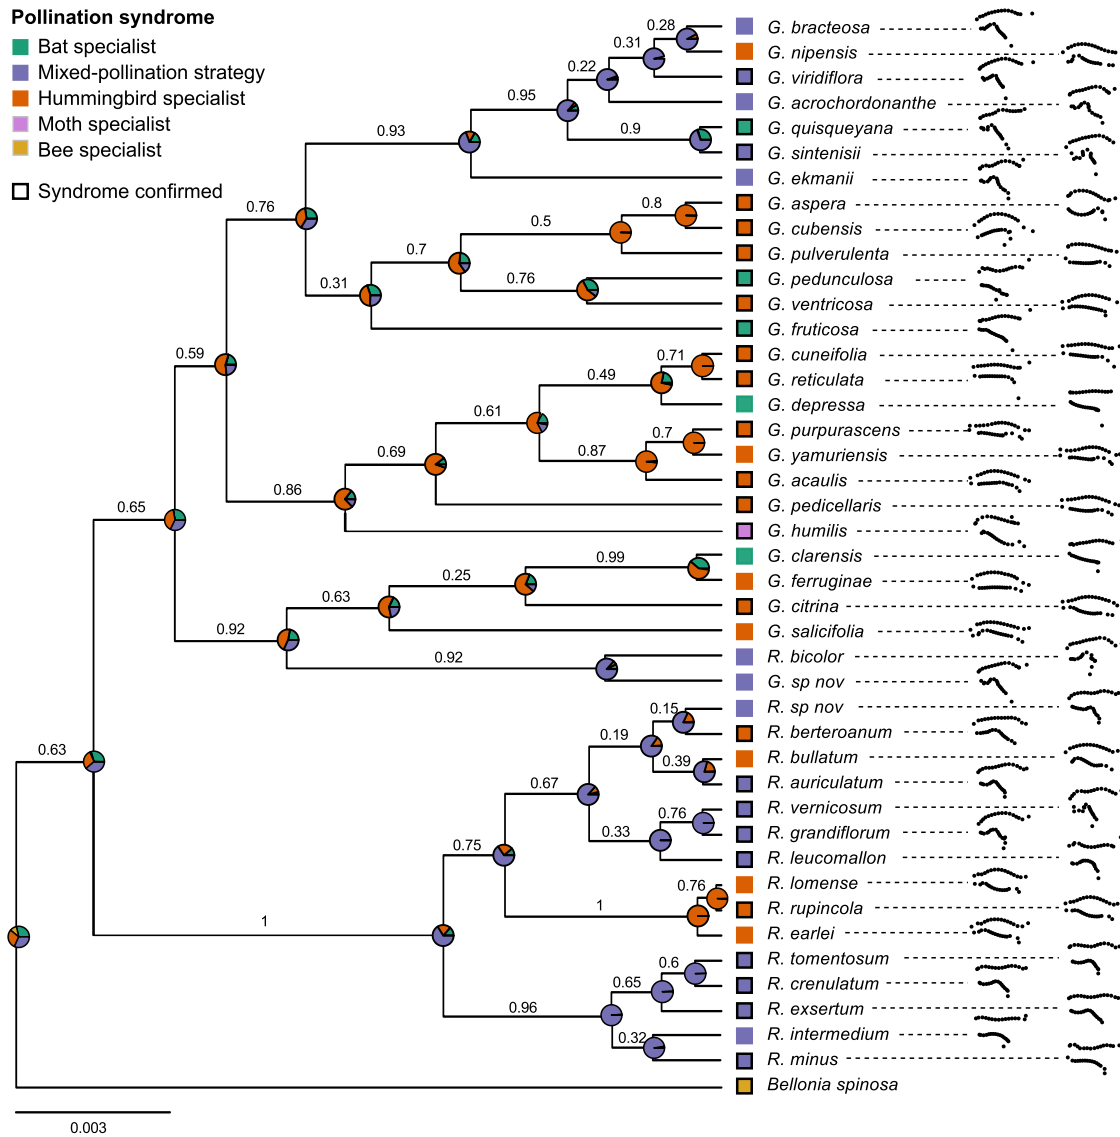

**Figure S1:** Species phylogeny showing mean corolla shapes (after Procrustes analysis). Pollination strategies are shown with those that have been confirmed indicated by a black contour. Pie charts represent the joint probability of each state at nodes as estimated by stochastic mapping from all species, that is including species with inferred pollinators. Clade posterior probabilities are shown above branches. Outgroup taxa are not shown.

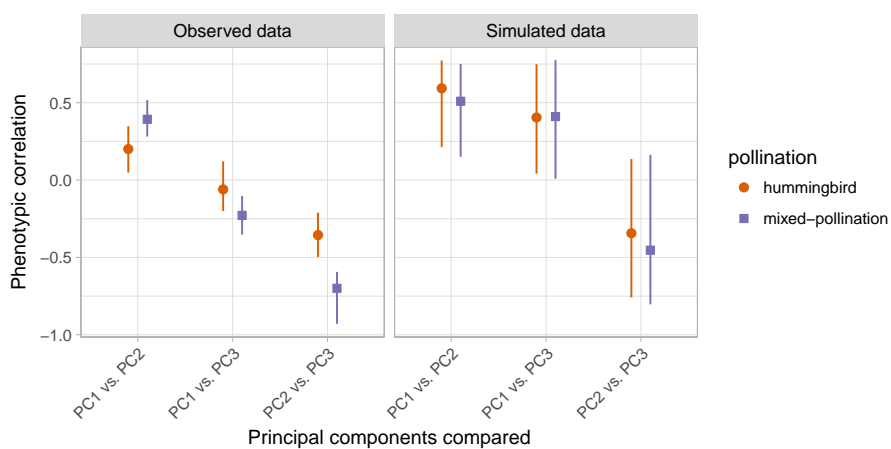

**Figure S2:** Graphical representation of the evolutionary correlations (i.e., standardized evolutionary rates matrices) obtained with the BMVM multivariate model when all species were included in the analysis, for the observed data (left panel) and for data simulated under the best fitting model (OUM; right panel). Symbols represent the median correlation and the lines the 25% and 75% quantiles for both hummingbirds and mixed-pollination strategies. No artifactual differences are detected between the two groups when fitting models on traits simulated with the OUM model and thus with a common evolutionary covariance (right panel, see text).
